# Supplementary material for: Proton transfer-induced competing product channels of microsolvated Y−(H2O)n + CH3I (Y = F, Cl, Br, I) reactions
Source: Royal Society of Chemistry journal article supplement (doi:10.1039/d1cp04873b), 2022-01-01
Supplement: d1cp04873b1.pdf [file d1cp04873b1.pdf]

## Supplementary Information

Proton transfer induced competing product channels of the  
microsolvated  $Y^-(H_2O)_n + CH_3I$  ( $Y = F, Cl, Br, I$ ) reactions

Xiaoyan Ji and Jing Xie\*

Key Laboratory of Cluster Science of Ministry of Education, School of Chemistry and Chemical  
Engineering, Beijing Institute of Technology, Beijing 100081, China

**Corresponding author:**

Jing Xie [jingxie@bit.edu.cn](mailto:jingxie@bit.edu.cn)

## Table of Contents

|                   |                                                                                                                                                               |     |
|-------------------|---------------------------------------------------------------------------------------------------------------------------------------------------------------|-----|
| Table of Contents |                                                                                                                                                               | S2  |
| Table S1          | Benchmark study of the reaction energies for PT <sub>CH3</sub> pathways                                                                                       | S3  |
| Table S2          | Energies of PT <sub>CH3</sub> pathway for the Y <sup>-</sup> (H <sub>2</sub> O) <sub>1,2</sub> + CH <sub>3</sub> I reactions                                  | S3  |
| Table S3          | Bond metrics for <sup>PT</sup> Ts1 transition states of the Y <sup>-</sup> (H <sub>2</sub> O) <sub>n=0,1,2</sub> + CH <sub>3</sub> I                          | S6  |
| Table S4          | Energies HO <sup>-</sup> -S <sub>N</sub> 2 pathway the Y <sup>-</sup> (H <sub>2</sub> O) <sub>1,2</sub> + CH <sub>3</sub> I reactions                         | S7  |
| Table S5          | Bond metrics for invTS' and FSTS' structures                                                                                                                  | S8  |
| Table S6          | Energy level of selected molecular orbital of Y <sup>-</sup> (H <sub>2</sub> O) <sub>0,1,2</sub> nucleophile                                                  | S9  |
| Table S7a         | EDA of inv-S <sub>N</sub> 2 and inv-S <sub>N</sub> 2' transition structures                                                                                   | S10 |
| Table S7b         | EDA of FSTS and FSTS' transition structures                                                                                                                   | S11 |
| Table S8          | Looseness and asymmetry index of the inv-S <sub>N</sub> 2 and inv-S <sub>N</sub> 2' structures                                                                | S12 |
| Table S9          | Bond metrics for nXC' and nXTS' structures                                                                                                                    | S14 |
| Table S10         | r <sup>vdw</sup> of the I-O distance of the nXC' and nXTS' structures                                                                                         | S15 |
| Figure S1         | PESs of PT <sub>CH3</sub> pathway of Cl <sup>-</sup> (H <sub>2</sub> O) <sub>1,2</sub> + CH <sub>3</sub> I reactions                                          | S16 |
| Figure S2         | Structures of PT <sub>CH3</sub> pathway of Cl <sup>-</sup> (H <sub>2</sub> O) <sub>1,2</sub> + CH <sub>3</sub> I reactions                                    | S17 |
| Figure S3         | PESs of PT <sub>CH3</sub> pathway of F <sup>-</sup> (H <sub>2</sub> O) <sub>1,2</sub> + CH <sub>3</sub> I reactions                                           | S18 |
| Figure S4         | Structures of PT <sub>CH3</sub> pathway of the F <sup>-</sup> (H <sub>2</sub> O) <sub>1,2</sub> + CH <sub>3</sub> I reactions                                 | S19 |
| Figure S5         | PESs of PT <sub>CH3</sub> pathway of Br <sup>-</sup> (H <sub>2</sub> O) <sub>1,2</sub> + CH <sub>3</sub> I reactions                                          | S20 |
| Figure S6         | Structures of PT <sub>CH3</sub> pathway of Br <sup>-</sup> (H <sub>2</sub> O) <sub>1,2</sub> + CH <sub>3</sub> I reactions                                    | S21 |
| Figure S7         | PES of PT <sub>CH3</sub> pathway of I <sup>-</sup> (H <sub>2</sub> O) <sub>1,2</sub> + CH <sub>3</sub> I reactions                                            | S22 |
| Figure S8         | Structures of PT <sub>CH3</sub> pathway of I <sup>-</sup> (H <sub>2</sub> O) <sub>1,2</sub> + CH <sub>3</sub> I reactions                                     | S23 |
| Figure S9         | PESs of HO <sup>-</sup> -S <sub>N</sub> 2 pathway of F <sup>-</sup> (H <sub>2</sub> O) <sub>1,2</sub> + CH <sub>3</sub> I reactions                           | S24 |
| FigureS10         | PESs of H <sub>2</sub> O-S <sub>N</sub> 2 pathway of Br <sup>-</sup> (H <sub>2</sub> O) <sub>1,2</sub> + CH <sub>3</sub> I reactions                          | S25 |
| FigureS11         | PESs of H <sub>2</sub> O-S <sub>N</sub> 2 pathway of I <sup>-</sup> (H <sub>2</sub> O) <sub>1,2</sub> + CH <sub>3</sub> I reactions                           | S26 |
| Figure S12        | Plots of barrier heights vs Looseness and asymmetry index                                                                                                     | S27 |
| Figure S13        | NBOs of the [H <sub>3</sub> C---I---OH <sub>2</sub> (Y)] <sup>-</sup> halogen-bonded complex                                                                  | S28 |
| Table S11         | The charge transfer stabilization energy of halogen-bonded complex                                                                                            | S28 |
| Figure S14        | Plot of complexation enthalpies of XC' as a function of proton affinity of the nucleophiles                                                                   | S29 |
| Figure S15        | IRC calculation of the invTS', XTS', and XTS <sub>iso</sub> of the Cl <sup>-</sup> (H <sub>2</sub> O) <sub>1,2</sub> + CH <sub>3</sub> I reactions            | S30 |
| Scheme S1         | PES of Y <sup>-</sup> -S <sub>N</sub> 2 and HO <sup>-</sup> -S <sub>N</sub> 2 channel for the Y <sup>-</sup> (H <sub>2</sub> O) + CH <sub>3</sub> I reactions | S31 |

**Table S1.** Benchmark study of the reaction energies for  $\text{PT}_{\text{CH}_3}$  pathways of  $\text{Cl}^-(\text{H}_2\text{O})_{n=0,1,2} + \text{CH}_3\text{I}$  reactions.

|       | Y = Cl                                                                       | B97-1 <sup>a</sup> | CCSD(T) <sup>a,b</sup> | Absolute Error |
|-------|------------------------------------------------------------------------------|--------------------|------------------------|----------------|
| n = 0 | $\text{CH}_2\text{I}^- + \text{HY}$                                          | 60.2(57.2)         | 58.8(55.8)             | 1.4(1.4)       |
| n = 1 | $\text{CH}_2\text{I}^- + \text{HY} + \text{H}_2\text{O}$                     | 75.3(70.5)         | 73.4(68.6)             | 1.9(1.9)       |
|       | $\text{CH}_2\text{I}^- + \text{HY}(\text{H}_2\text{O})$                      | 69.1(65.5)         | 67.7(64.1)             | 1.4(1.4)       |
|       | $\text{CH}_2\text{I}^-(\text{H}_2\text{O}) + \text{HY}$                      | 55.7(51.9)         | 54.3(50.5)             | 1.4(1.4)       |
| n = 2 | $\text{CH}_2\text{I}^- + \text{HY} + 2\text{H}_2\text{O}$                    | 89.9(83.5)         | 88.6(82.2)             | 1.3(1.3)       |
|       | $\text{CH}_2\text{I}^- + \text{HY}(\text{H}_2\text{O}) + \text{H}_2\text{O}$ | 83.7(78.5)         | 82.9(77.7)             | 0.8(0.8)       |
|       | $\text{CH}_2\text{I}^- + \text{HY}(\text{H}_2\text{O})_2$                    | 75.3(71.7)         | 74.8(71.2)             | 0.5(0.5)       |
|       | $\text{CH}_2\text{I}^-(\text{H}_2\text{O}) + \text{HY} + \text{H}_2\text{O}$ | 70.3(64.9)         | 69.5(64.1)             | 0.8(0.8)       |
|       | $\text{CH}_2\text{I}^-(\text{H}_2\text{O}) + \text{HY}(\text{H}_2\text{O})$  | 64.1(59.5)         | 63.8(59.6)             | 0.3(0.1)       |
|       | $\text{CH}_2\text{I}^-(\text{H}_2\text{O})_2 + \text{HY}$                    | 50.0(45.8)         | 48.0(43.8)             | 2.0(2.0)       |
|       | Mean absolute Error                                                          |                    |                        | 1.2(1.2)       |

<sup>a</sup>Calculated energies in kcal/mol. Values in normal text are electronic energy without zero-point energy (ZPE) correction; enthalpy values at 298.15 K are in parentheses.

<sup>b</sup>The values are single point energy calculated on top of structures optimized with B97-1/ECP/d method.

**Table S2.** Calculated energies (kcal/mol) of the stationary points on the PES profiles of  $\text{PT}_{\text{CH}_3}$  product channel for the  $\text{Y}^-(\text{H}_2\text{O})_{1,2} + \text{CH}_3\text{I}$  ( $\text{Y} = \text{F}, \text{Cl}, \text{Br}, \text{I}$ ) reactions at the B97-1/ECP/d level of theory. Values without zero-point-energy (ZPE) corrections are in normal text, enthalpy values at 298.15 K are in parentheses.

| $\text{Y}^-$                                             | $\text{F}^-(\text{H}_2\text{O})$ | $\text{Cl}^-(\text{H}_2\text{O})$ | $\text{Br}^-(\text{H}_2\text{O})$ | $\text{I}^-(\text{H}_2\text{O})$ |
|----------------------------------------------------------|----------------------------------|-----------------------------------|-----------------------------------|----------------------------------|
| $\text{Y}^-(\text{H}_2\text{O}) + \text{CH}_3\text{I}$   | 0.0                              | 0.0                               | 0.0                               | 0.0                              |
| 1HRC                                                     | -14.3 (-13.0)                    | -                                 | -                                 | -                                |
| 1HTS                                                     | -13.4 (-12.7)                    | -                                 | -                                 | -                                |
| 1RC                                                      | -13.5 (-12.2)                    | -10.4 (-9.2)                      | -9.6 (-8.5)                       | -8.1 (-7.5)                      |
| 1 <sup>PT</sup> TS1 <sub>a</sub>                         | 16.8 (16.1)                      | 45.8 (42.4)                       | 53.2 (49.3)                       | 59.0 (54.7)                      |
| 1 <sup>PT</sup> TS1 <sub>b</sub>                         | 18.5 (17.7)                      | 47.3 (43.9)                       | 54.7 (50.8)                       | 60.6 (56.2)                      |
| 1 <sup>PT</sup> TS1 <sub>c</sub>                         | 25.3 (24.6)                      | 54.3 (50.8)                       | 61.0 (57.0)                       | 66.5 (62.2)                      |
| 1 <sup>PT</sup> TS1 <sub>d</sub>                         | 27.1 (26.6)                      | 55.9 (52.3)                       | 61.5 (57.5)                       | 67.3 (62.9)                      |
| 1 <sup>PT</sup> TS1 <sub>e</sub>                         | -                                | -                                 | 63.2 (59.1)                       | 69.1 (64.6)                      |
| 1 <sup>PT</sup> TS2 <sub>a</sub>                         | 16.0 (15.1)                      | 44.5 (40.7)                       | 51.4 (47.1)                       | 57.5 (52.8)                      |
| 1 <sup>PT</sup> TS2 <sub>b</sub>                         | 17.2 (16.3)                      | 45.9 (42.4)                       | 53.1 (49.1)                       | 58.8 (54.4)                      |
| 1 <sup>PT</sup> TS2 <sub>d</sub>                         | 25.8 (25.1)                      | 55.0 (51.6)                       | -                                 | -                                |
| 1 <sup>PT</sup> TS2 <sub>e</sub>                         | 25.0 (24.3)                      | 53.5 (49.8)                       | 62.2 (58.2)                       | 68.2 (63.8)                      |
| 1 <sup>PT</sup> TS2 <sub>f</sub>                         | -                                | -                                 | 60.1 (55.8)                       | 66.1 (55.8)                      |
| 1 <sup>PT</sup> PC1 <sub>a</sub>                         | 15.5 (15.4)                      | 43.8 (40.8)                       | 50.5 (47.0)                       | 56.6 (52.5)                      |
| 1 <sup>PT</sup> PC1 <sub>b</sub>                         | 16.1 (16.0)                      | 44.4 (41.5)                       | -                                 | -                                |
| 1 <sup>PT</sup> PC1 <sub>c</sub>                         | 24.7 (24.7)                      | 53.3 (50.2)                       | 59.5 (56.0)                       | 65.4 (61.3)                      |
| 1 <sup>PT</sup> PC1 <sub>d</sub>                         | 22.6 (22.7)                      | -                                 | 59.8 (56.2)                       | 65.9 (61.5)                      |
| 1 <sup>PT</sup> PC2 <sub>a</sub>                         | 15.2 (14.9)                      | 43.3 (40.1)                       | 49.9 (46.1)                       | 55.7 (51.4)                      |
| 1 <sup>PT</sup> PC2 <sub>d</sub>                         | 24.2 (24.1)                      | 52.4 (49.1)                       | -                                 | -                                |
| 1 <sup>PT</sup> PC2 <sub>e</sub>                         | -                                | -                                 | 58.6 (54.8)                       | 64.2 (59.7)                      |
| $\text{CH}_2\text{I}^- + \text{HY} + \text{H}_2\text{O}$ | 48.1 (45.7)                      | 75.3 (70.5)                       | 82.1 (76.9)                       | 86.4 (80.7)                      |
| $\text{CH}_2\text{I}^- + \text{HY}(\text{H}_2\text{O})$  | 38.9 (38.1)                      | 69.1 (65.5)                       | 76.9 (72.8)                       | 83.0 (78.4)                      |
| $\text{CH}_2\text{I}^-(\text{H}_2\text{O}) + \text{HY}$  | 28.4 (27.1)                      | 55.7 (51.9)                       | 62.5 (58.3)                       | 66.8 (66.2)                      |

  

| $\text{Y}^-$                                             | $\text{F}^-(\text{H}_2\text{O})_2$ | $\text{Cl}^-(\text{H}_2\text{O})_2$ | $\text{Br}^-(\text{H}_2\text{O})_2$ | $\text{I}^-(\text{H}_2\text{O})_2$ |
|----------------------------------------------------------|------------------------------------|-------------------------------------|-------------------------------------|------------------------------------|
| $\text{Y}^-(\text{H}_2\text{O})_2 + \text{CH}_3\text{I}$ | 0.0                                | 0.0                                 | 0.0                                 | 0.0                                |
| 2RC <sub>a</sub>                                         | -11.3 (-9.9)                       | -9.4 (-8.2)                         | -8.8 (-7.6)                         | -8.8 (-7.6)                        |
| 2RC <sub>b</sub>                                         | -6.4 (-5.7)                        | -9.2 (-7.8)                         | -8.6 (-7.4)                         | -8.6 (-7.4)                        |
| 2RC <sub>c</sub>                                         | -                                  | -8.0 (-7.1)                         | -7.3 (-6.4)                         | -7.3 (-6.4)                        |
| 2RC <sub>d</sub>                                         | -                                  | -7.1 (-6.1)                         | -7.0 (-5.9)                         | -7.0 (-5.9)                        |
| 2 <sup>PT</sup> TS1 <sub>a</sub>                         | 24.5 (23.2)                        | 48.1 (44.2)                         | 54.3 (49.9)                         | 57.5 (52.8)                        |

|                                                                           | F <sup>-</sup> (H <sub>2</sub> O) <sub>2</sub> | Cl <sup>-</sup> (H <sub>2</sub> O) <sub>2</sub> | Br <sup>-</sup> (H <sub>2</sub> O) <sub>2</sub> | I <sup>-</sup> (H <sub>2</sub> O) <sub>2</sub> |
|---------------------------------------------------------------------------|------------------------------------------------|-------------------------------------------------|-------------------------------------------------|------------------------------------------------|
| 2 <sup>PT</sup> TS1 <sub>b</sub>                                          | 24.9 (23.6)                                    | 47.5 (43.6)                                     | 53.8 (49.4)                                     | 58.3 (53.4)                                    |
| 2 <sup>PT</sup> TS1 <sub>c</sub>                                          | 26.2 (24.9)                                    | 48.6 (44.7)                                     | 54.8 (50.5)                                     | 59.2 (54.4)                                    |
| 2 <sup>PT</sup> TS1 <sub>d</sub>                                          | 26.1 (25.5)                                    | 48.8 (44.7)                                     | 54.9 (50.4)                                     | 59.4 (54.3)                                    |
| 2 <sup>PT</sup> TS1 <sub>e</sub>                                          | 29.3 (28.4)                                    | 52.7 (49.0)                                     | 58.9 (54.8)                                     | 63.7 (59.0)                                    |
| 2 <sup>PT</sup> TS1 <sub>f</sub>                                          | 31.4 (30.5)                                    | 54.0 (50.3)                                     | 60.2 (56.0)                                     | 64.7 (60.1)                                    |
| 2 <sup>PT</sup> TS1 <sub>g</sub>                                          | 38.1 (37.5)                                    | 60.7 (57.2)                                     | 67.0 (63.0)                                     | 71.7 (67.3)                                    |
| 2 <sup>PT</sup> TS1 <sub>h</sub>                                          | 38.4 (37.4)                                    | 61.2 (57.4)                                     | 67.1 (62.8)                                     | 71.8 (67.1)                                    |
| 2 <sup>PT</sup> TS2 <sub>a</sub>                                          | 29.1 (27.9)                                    | 46.0 (41.7)                                     | 51.9 (47.1)                                     | 56.2 (51.1)                                    |
| 2 <sup>PT</sup> TS2 <sub>b</sub>                                          | 23.7 (22.3)                                    | 46.2 (41.4)                                     | 52.1 (46.8)                                     | 56.9 (51.1)                                    |
| 2 <sup>PT</sup> TS2 <sub>c</sub>                                          | 25.0 (23.4)                                    | 47.2 (43.1)                                     | 53.3 (48.8)                                     | 57.5 (52.6)                                    |
| 2 <sup>PT</sup> TS2 <sub>d</sub>                                          | 25.1 (23.4)                                    | 47.4 (43.1)                                     | 53.5 (48.8)                                     | 57.7 (52.3)                                    |
| 2 <sup>PT</sup> TS2 <sub>e</sub>                                          | 28.8 (28.2)                                    | 51.2 (47.3)                                     | 51.2 (47.3)                                     | 62.1 (57.2)                                    |
| 2 <sup>PT</sup> TS2 <sub>f</sub>                                          | 29.7 (28.6)                                    | 52.5 (48.8)                                     | 58.7 (54.4)                                     | 63.2 (58.6)                                    |
| 2 <sup>PT</sup> TS2 <sub>g</sub>                                          | 37.3 (36.5)                                    | 60.1 (56.7)                                     | 66.2 (62.2)                                     | 71.0 (66.5)                                    |
| 2 <sup>PT</sup> PC1 <sub>a</sub>                                          | 23.1 (22.4)                                    | 45.5 (42.0)                                     | 51.4 (47.3)                                     | 56.0 (51.7)                                    |
| 2 <sup>PT</sup> PC1 <sub>b</sub>                                          | 23.4 (22.7)                                    | 45.1 (41.9)                                     | 51.1 (47.1)                                     | 56.7 (51.2)                                    |
| 2 <sup>PT</sup> PC1 <sub>c</sub>                                          | 24.1 (23.5)                                    | 46.1 (42.9)                                     | 51.9 (48.2)                                     | 56.4 (52.3)                                    |
| 2 <sup>PT</sup> PC1 <sub>d</sub>                                          | 24.4 (23.6)                                    | 46.4 (43.0)                                     | 52.2 (48.3)                                     | 56.7 (52.4)                                    |
| 2 <sup>PT</sup> PC1 <sub>e</sub>                                          | 28.5 (28.2)                                    | 50.8 (47.8)                                     | 56.5 (52.7)                                     | 61.4 (57.0)                                    |
| 2 <sup>PT</sup> PC1 <sub>f</sub>                                          | 27.4 (27.1)                                    | 50.0 (46.8)                                     | -                                               | -                                              |
| 2 <sup>PT</sup> PC1 <sub>g</sub>                                          | 33.4 (33.4)                                    | -                                               | -                                               | -                                              |
| 2 <sup>PT</sup> PC1 <sub>h</sub>                                          | 38.1 (37.7)                                    | 60.4 (57.1)                                     | 65.9 (61.9)                                     | 70.8 (66.2)                                    |
| 2 <sup>PT</sup> PC2 <sub>a</sub>                                          | 28.1 (27.6)                                    | 44.9 (41.0)                                     | 50.8 (46.2)                                     | 55.0 (50.3)                                    |
| 2 <sup>PT</sup> PC2 <sub>b</sub>                                          | 23.0 (21.9)                                    | -                                               | -                                               | -                                              |
| 2 <sup>PT</sup> PC2 <sub>c</sub>                                          | -                                              | 44.8 (41.1)                                     | 50.4 (46.2)                                     | 50.4 (46.2)                                    |
| 2 <sup>PT</sup> PC2 <sub>d</sub>                                          | 23.1 (21.8)                                    | -                                               | -                                               | -                                              |
| 2 <sup>PT</sup> PC2 <sub>e</sub>                                          | -                                              | 50.3 (46.9)                                     | 55.9 (51.9)                                     | 60.7 (56.1)                                    |
| 2 <sup>PT</sup> PC2 <sub>g</sub>                                          | 35.9 (35.7)                                    | 57.8 (54.6)                                     | 63.0 (59.1)                                     | 64.7 (62.8)                                    |
| 2 <sup>PT</sup> PC2 <sub>h</sub>                                          | 37.5 (37.1)                                    | 59.5 (56.0)                                     | 64.6 (60.5)                                     | 64.6 (60.5)                                    |
| CH <sub>2</sub> I <sup>-</sup> + HY + 2H <sub>2</sub> O                   | 69.2 (65.1)                                    | 89.9 (83.5)                                     | 95.6 (88.7)                                     | 98.4 (91.2)                                    |
| CH <sub>2</sub> I <sup>-</sup> + HY(H <sub>2</sub> O) + H <sub>2</sub> O  | 60.1 (57.7)                                    | 83.7 (78.5)                                     | 90.3 (84.6)                                     | 95.1 (88.9)                                    |
| CH <sub>2</sub> I <sup>-</sup> + HY(H <sub>2</sub> O) <sub>2</sub>        | 50.5 (49.7)                                    | 75.3 (71.7)                                     | 82.1 (78.0)                                     | 87.9 (83.3)                                    |
| CH <sub>2</sub> I <sup>-</sup> (H <sub>2</sub> O) + HY + H <sub>2</sub> O | 49.6 (46.6)                                    | 70.3 (64.9)                                     | 75.9 (70.1)                                     | 78.8 (72.6)                                    |
| CH <sub>2</sub> I <sup>-</sup> (H <sub>2</sub> O) + HY(H <sub>2</sub> O)  | 40.5 (39.0)                                    | 64.1 (59.5)                                     | 70.7 (66.1)                                     | 75.5 (70.3)                                    |
| CH <sub>2</sub> I <sup>-</sup> (H <sub>2</sub> O) <sub>2</sub> + HY       | 29.4 (27.5)                                    | 50.0 (45.8)                                     | 55.7 (51.1)                                     | 58.6 (53.6)                                    |

**Table S3.** Bond metrics for  ${}^{\text{PTTS1}}$  transition states of the proton transfer channel for the  $\text{Y}^-(\text{H}_2\text{O})_{n=0,1,2} + \text{CH}_3\text{I}$  reactions at B97-1/ECP/d level of theory. Bond distances are in Angstrom, angles are in degree, and imaginary frequency in  $\text{cm}^{-1}$ .

|   |                                     | $n^{\text{PTTS1}}$ |       |       |       |                         |                         |           |
|---|-------------------------------------|--------------------|-------|-------|-------|-------------------------|-------------------------|-----------|
| n |                                     | C-H(Y)             | C-I   | H-I   | H-Y   | $\angle\text{I-C-H(Y)}$ | $\angle\text{C-I-H(Y)}$ | frequency |
| 0 | $\text{F}^-$                        | 2.968              | 2.334 | 2.547 | 0.944 | 55.9                    | 74.8                    | i124      |
| 0 | $\text{Br}^-$                       | 2.736              | 2.332 | 2.491 | 1.478 | 58.2                    | 69.0                    | i309      |
| 0 | $\text{I}^-$                        | 2.710              | 2.330 | 2.522 | 1.650 | 59.5                    | 67.8                    | i351      |
| 1 | $\text{F}^-(\text{H}_2\text{O})$    | 2.731              | 2.305 | 2.582 | 0.942 | 61.0                    | 67.7                    | i157      |
| 1 | $\text{Br}^-(\text{H}_2\text{O})$   | 2.592              | 2.299 | 2.597 | 1.467 | 63.8                    | 63.6                    | i328      |
| 1 | $\text{I}^-(\text{H}_2\text{O})$    | 2.600              | 2.295 | 2.661 | 1.637 | 65.5                    | 62.8                    | i360      |
| 2 | $\text{F}^-(\text{H}_2\text{O})_2$  | 2.641              | 2.288 | 2.654 | 0.939 | 64.7                    | 64.1                    | i173      |
| 2 | $\text{Br}^-(\text{H}_2\text{O})_2$ | 2.540              | 2.278 | 2.656 | 1.462 | 66.7                    | 61.4                    | i313      |
| 2 | $\text{I}^-(\text{H}_2\text{O})_2$  | 2.570              | 2.280 | 2.763 | 1.630 | 68.7                    | 60.7                    | i349      |

**Table S4.** Calculated energies (kcal/mol) of the stationary points on the PES profiles of HO<sup>-</sup>-S<sub>N</sub>2 product channel for the Y<sup>-</sup>(H<sub>2</sub>O)<sub>1,2</sub> + CH<sub>3</sub>I (Y = F, Cl, Br, I) reactions at the B97-1/ECP/d level of theory. Values without zero-point-energy (ZPE) corrections are in normal text, enthalpy values at 298.15 K are in parentheses.

| Y <sup>-</sup>                                        | F <sup>-</sup> (H <sub>2</sub> O) | Cl <sup>-</sup> (H <sub>2</sub> O) | Br <sup>-</sup> (H <sub>2</sub> O) | I <sup>-</sup> (H <sub>2</sub> O) |
|-------------------------------------------------------|-----------------------------------|------------------------------------|------------------------------------|-----------------------------------|
| Y <sup>-</sup> (H <sub>2</sub> O) + CH <sub>3</sub> I | 0.0                               | 0.0                                | 0.0                                | 0.0                               |
| 1HRC                                                  | -14.3 (-13.0)                     | -                                  | -                                  | -                                 |
| 1RC                                                   | -                                 | -10.4 (-9.2)                       | -9.7 (-8.5)                        | -8.7 (-7.5)                       |
| 1invTS'                                               | -6.6 (-7.2)                       | 6.3 (6.6)                          | 9.1 (9.5)                          | 12.3 (12.9)                       |
| 1PC'                                                  | -47.4 (-44.1)                     | -19.4 (-19.7)                      | -14.5 (-14.0)                      | -10.0 (-9.2)                      |
| 1FSTS'                                                | 24.8 (24.0)                       | 33.9 (34.0)                        | 35.9 (35.9)                        | 38.2 (38.2)                       |
| 1XC'                                                  | -9.7 (-10.4)                      | -4.8 (-4.6)                        | -4.2 (-3.3)                        | -3.7 (-2.7)                       |
| 1XTS <sub>iso</sub>                                   | -5.6 (-5.4)                       | -2.6 (-2.2)                        | -2.1 (-1.7)                        | -1.6 (-1.1)                       |
| 1XTS'                                                 | -1.9 (-1.5)                       | -1.3 (-0.8)                        | -1.2 (-0.7)                        | -1.2 (-0.6)                       |
| 1XC                                                   | -15.6 (-14.1)                     | -8.3 (-7.3)                        | -7.1 (-6.2)                        | -5.8 (-4.9)                       |
| 1XTS                                                  | -2.3 (-1.8)                       | -1.5 (-1.0)                        | -1.3 (-0.9)                        | -1.2 (-0.7)                       |
| CH <sub>3</sub> OH + I <sup>-</sup> + HY              | -17.9 (-17.3)                     | 9.4 (7.4)                          | 16.2 (13.8)                        | 20.5 (17.7)                       |

  

| Y <sup>-</sup>                                                     | F <sup>-</sup> (H <sub>2</sub> O) <sub>2</sub> | Cl <sup>-</sup> (H <sub>2</sub> O) <sub>2</sub> | Br <sup>-</sup> (H <sub>2</sub> O) <sub>2</sub> | I <sup>-</sup> (H <sub>2</sub> O) <sub>2</sub> |
|--------------------------------------------------------------------|------------------------------------------------|-------------------------------------------------|-------------------------------------------------|------------------------------------------------|
| Y <sup>-</sup> (H <sub>2</sub> O) <sub>2</sub> + CH <sub>3</sub> I | 0.0                                            | 0.0                                             | 0.0                                             | 0.0                                            |
| 2HRC <sub>a</sub>                                                  | -11.4 (-9.9)                                   | -                                               | -                                               | -                                              |
| 2HRC <sub>b</sub>                                                  | -11.3 (-9.9)                                   | -                                               | -                                               | -                                              |
| 2RC                                                                | -                                              | -9.0 (-7.8)                                     | -8.6 (-7.4)                                     | -7.9 (-6.7)                                    |
| 2invTS' <sub>a</sub>                                               | 0.5 (0.9)                                      | 7.2 (8.2)                                       | 8.9 (10.0)                                      | 11.1 (12.2)                                    |
| 2invTS' <sub>b</sub>                                               | 1.1 (1.1)                                      | -                                               | -                                               | -                                              |
| 2invTS' <sub>c</sub>                                               | 6.2 (4.5)                                      | -                                               | -                                               | -                                              |
| 2PC' <sub>a</sub>                                                  | -38.8 (-35.4)                                  | -16.9 (-17.0)                                   | -13.3 (-12.4)                                   | -10.3 (-9.1)                                   |
| 2PC' <sub>b</sub>                                                  | -37.3 (-34.2)                                  | -15.9 (-15.7)                                   | -12.2 (-11.5)                                   | -8.7 (-7.7)                                    |
| 2PC' <sub>c</sub>                                                  | -36.8 (-33.5)                                  | -15.5 (-15.5)                                   | -12.0 (-11.2)                                   | -8.5 (-7.6)                                    |
| 2PC' <sub>d</sub>                                                  | -36.7 (-33.5)                                  | -14.2 (-14.4)                                   | -10.8 (-10.0)                                   | -7.0 (-6.2)                                    |
| 2PC' <sub>e</sub>                                                  | -35.1 (-32.0)                                  | -14.3 (-13.7)                                   | -10.3 (-10.0)                                   | -                                              |
| 2FSTS' <sub>a</sub>                                                | 30.8 (31.0)                                    | 36.6 (36.7)                                     | 38.1 (38.1)                                     | 40.0 (39.9)                                    |
| 2FSTS' <sub>b</sub>                                                | 32.1 (31.5)                                    | 38.5 (38.2)                                     | 39.7 (39.6)                                     | 41.1 (40.9)                                    |
| 2XC' <sub>a</sub>                                                  | -6.6 (-6.5)                                    | -4.5 (-3.5)                                     | -4.2 (-3.1)                                     | -3.7 (-2.7)                                    |
| 2XC' <sub>b</sub>                                                  | -3.6 (-4.0)                                    | -0.9 (-0.1)                                     | -1.0 (-0.1)                                     | -1.2 (-0.2)                                    |
| 2XTS <sub>iso</sub>                                                | -3.7 (-3.2)                                    | -1.7 (-1.3)                                     | -1.4 (-0.9)                                     | -1.0 (-0.5)                                    |
| 2XTS'                                                              | -                                              | -1.9 (-1.6)                                     | -1.6 (-1.3)                                     | -1.2 (-1.0)                                    |
| 2XC                                                                | -10.6 (-9.0)                                   | -6.6 (-5.6)                                     | -6.0 (-4.9)                                     | -5.1 (-4.1)                                    |
| 2XTS                                                               | -1.5 (-0.8)                                    | -1.9 (-1.3)                                     | -2.1 (-1.4)                                     | -2.4 (-1.8)                                    |
| CH <sub>3</sub> OH + I <sup>-</sup> + HY + H <sub>2</sub> O        | 3.3 (2.1)                                      | 24.0 (20.4)                                     | 29.7 (25.7)                                     | 32.5 (28.2)                                    |
| CH <sub>3</sub> OH(H <sub>2</sub> O) + I <sup>-</sup> + HY         | -2.2 (-1.8)                                    | 18.5 (16.6)                                     | 24.1 (21.8)                                     | 27.0(24.3)                                     |
| CH <sub>3</sub> OH + I <sup>-</sup> + HY(H <sub>2</sub> O)         | -5.8 (-5.5)                                    | 17.8 (15.5)                                     | 24.4 (21.6)                                     | 29.2 (25.9)                                    |
| CH <sub>3</sub> OH + I <sup>-</sup> (H <sub>2</sub> O) + HY        | -7.6 (-7.0)                                    | 13.1 (11.3)                                     | 18.8 (16.6)                                     | 21.7 (19.1)                                    |

**Table S5.** Bond metrics for invTS' and FSTS' transition states of the HO<sup>-</sup>-S<sub>N</sub>2 channel for the Y<sup>-</sup>(H<sub>2</sub>O)<sub>n=1,2</sub> + CH<sub>3</sub>I reactions at B97-1/ECP/d level of theory. Bond distances are in Angstrom, angles are in degree, and imaginary frequency in cm<sup>-1</sup>.

| invTS'                                          |       |       |       |       |       |        |           |
|-------------------------------------------------|-------|-------|-------|-------|-------|--------|-----------|
|                                                 | C-I   | C-O   | O-H   | H-Y   | O-Y   | ∠I-C-O | frequency |
| F <sup>-</sup> (H <sub>2</sub> O)               | 2.522 | 2.191 | 1.246 | 1.116 | 2.362 | 177.9  | i401      |
| Cl <sup>-</sup> (H <sub>2</sub> O)              | 2.747 | 1.941 | 1.05  | 1.812 | 2.855 | 175.9  | i398      |
| Br <sup>-</sup> (H <sub>2</sub> O)              | 2.79  | 1.901 | 1.037 | 1.996 | 3.021 | 175.6  | i382      |
| I <sup>-</sup> (H <sub>2</sub> O)               | 2.84  | 1.854 | 1.025 | 2.256 | 3.258 | 175.2  | i366      |
| F <sup>-</sup> (H <sub>2</sub> O) <sub>2</sub>  | 2.635 | 2.048 | 1.099 | 1.286 | 2.381 | 177.2  | i419      |
| Cl <sup>-</sup> (H <sub>2</sub> O) <sub>2</sub> | 2.753 | 1.933 | 1.008 | 2.01  | 2.971 | 176    | i382      |
| Br <sup>-</sup> (H <sub>2</sub> O) <sub>2</sub> | 2.777 | 1.909 | 1.001 | 2.213 | 3.153 | 175.8  | i376      |
| I <sup>-</sup> (H <sub>2</sub> O) <sub>2</sub>  | 2.806 | 1.882 | 0.995 | 2.495 | 3.411 | 175.7  | i372      |

  

| FSTS'                                           |       |       |       |        |        |        |           |
|-------------------------------------------------|-------|-------|-------|--------|--------|--------|-----------|
|                                                 | C-I   | C-O   | I-O   | ∠C-I-O | ∠C-O-I | ∠I-C-O | frequency |
| F <sup>-</sup> (H <sub>2</sub> O)               | 2.897 | 2.231 | 3.345 | 41.1   | 58.6   | 80.3   | i530      |
| Cl <sup>-</sup> (H <sub>2</sub> O)              | 3.035 | 2.227 | 3.317 | 40.7   | 62.8   | 76.4   | i476      |
| Br <sup>-</sup> (H <sub>2</sub> O)              | 3.048 | 2.223 | 3.307 | 40.7   | 63.4   | 75.9   | i483      |
| I <sup>-</sup> (H <sub>2</sub> O)               | 3.06  | 2.221 | 3.296 | 40.7   | 63.9   | 75.4   | i485      |
| F <sup>-</sup> (H <sub>2</sub> O) <sub>2</sub>  | 2.98  | 2.226 | 3.336 | 40.8   | 61     | 78.1   | i483      |
| Cl <sup>-</sup> (H <sub>2</sub> O) <sub>2</sub> | 3.051 | 2.241 | 3.316 | 40.9   | 63.1   | 75.9   | i464      |
| Br <sup>-</sup> (H <sub>2</sub> O) <sub>2</sub> | 3.069 | 2.24  | 3.31  | 40.9   | 63.8   | 75.3   | i467      |
| I <sup>-</sup> (H <sub>2</sub> O) <sub>2</sub>  | 3.082 | 2.242 | 3.304 | 40.9   | 64.2   | 74.9   | i463      |



**Table S6.** Energy level of selected molecular orbital of  $Y^-(H_2O)_{0,1,2}$  nucleophile as calculated with B97-1/ECP/d method.

| <b>n</b>       | <b>0</b>     |              |       | <b>1</b> |              |       | <b>2</b> |        |  |
|----------------|--------------|--------------|-------|----------|--------------|-------|----------|--------|--|
|                | E (eV)       | HOMO         | HOMO  | HOMO-1   | HOMO-2       | HOMO  | HOMO-1   | HOMO-2 |  |
| $F^-(H_2O)_n$  | <b>0.20</b>  | <b>-1.53</b> | -1.56 | -1.68    | <b>-2.66</b> | -2.70 | -2.86    |        |  |
| $Cl^-(H_2O)_n$ | <b>-0.73</b> | <b>-1.44</b> | -1.46 | -1.62    | <b>-2.06</b> | -2.15 | -2.26    |        |  |
| $Br^-(H_2O)_n$ | <b>-0.80</b> | <b>-1.38</b> | -1.40 | -1.55    | <b>-1.90</b> | -1.98 | -2.10    |        |  |
| $I^-(H_2O)_n$  | <b>-0.84</b> | <b>-1.31</b> | -1.33 | -1.46    | <b>-1.73</b> | -1.79 | -1.92    |        |  |
| $HO^-(H_2O)_n$ | <b>1.15</b>  | <b>-0.55</b> | -0.66 | -1.66    | <b>-1.44</b> | -1.57 | -2.86    |        |  |

**Table S7a.** Energy decomposition analysis of inv-S<sub>N</sub>2 and inv-S<sub>N</sub>2' transition structures of Y<sup>-</sup>(H<sub>2</sub>O)<sub>n</sub> + CH<sub>3</sub>I S<sub>N</sub>2 reaction at B97-1/ECP/d level.

| n      | inv-S <sub>N</sub> 2 |                   |                               |                                                |                   | invTS-S <sub>N</sub> 2' |                   |                               |                                                |                   |
|--------|----------------------|-------------------|-------------------------------|------------------------------------------------|-------------------|-------------------------|-------------------|-------------------------------|------------------------------------------------|-------------------|
|        | ΔE <sup>‡</sup>      | ΔE <sub>int</sub> | ΔE <sub>prep</sub><br>overall | Y <sup>-</sup> (H <sub>2</sub> O) <sub>n</sub> | CH <sub>3</sub> I | ΔE <sup>‡</sup>         | ΔE <sub>int</sub> | ΔE <sub>prep</sub><br>overall | Y <sup>-</sup> (H <sub>2</sub> O) <sub>n</sub> | CH <sub>3</sub> I |
| Y = F  |                      |                   |                               |                                                |                   |                         |                   |                               |                                                |                   |
| 0      | -17.8                | -19.5             | 1.7                           | 0.0                                            | 1.7               |                         |                   |                               |                                                |                   |
| 1      | -11.7                | -24.3             | 12.6                          | 0.9                                            | 11.7              | -6.6                    | -23.5             | 16.9                          | 3.5                                            | 13.4              |
| 2      | -4.7                 | -25.7             | 21.0                          | 2.0                                            | 19.0              | 0.5                     | -24.0             | 24.5                          | 3.7                                            | 20.8              |
| Y = Cl |                      |                   |                               |                                                |                   |                         |                   |                               |                                                |                   |
| 0      | -8.7                 | -26.3             | 17.6                          | 0.0                                            | 17.6              |                         |                   |                               |                                                |                   |
| 1      | -3.6                 | -26.4             | 22.8                          | 0.3                                            | 22.5              | 6.3                     | -24.9             | 31.2                          | 3.0                                            | 28.2              |
| 2      | 0.4                  | -27.2             | 27.6                          | 3.4                                            | 24.2              | 7.2                     | -24.7             | 31.9                          | 3.2                                            | 28.7              |
| Y = Br |                      |                   |                               |                                                |                   |                         |                   |                               |                                                |                   |
| 0      | -6.2                 | -27.2             | 21.0                          | 0.0                                            | 21.0              |                         |                   |                               |                                                |                   |
| 1      | -1.9                 | -27.0             | 25.1                          | 0.3                                            | 24.8              | 9.1                     | -24.9             | 34.0                          | 2.9                                            | 31.1              |
| 2      | 2.0                  | -27.6             | 29.6                          | 0.6                                            | 29.0              | 8.9                     | -24.7             | 33.6                          | 3.3                                            | 30.3              |
| Y = I  |                      |                   |                               |                                                |                   |                         |                   |                               |                                                |                   |
| 0      | -3.6                 | -27.9             | 24.3                          | 0.0                                            | 24.3              |                         |                   |                               |                                                |                   |
| 1      | -0.1                 | -27.1             | 27.0                          | 0.6                                            | 26.4              | 12.3                    | -25.0             | 37.3                          | 2.7                                            | 34.6              |
| 2      | 2.2                  | -29.0             | 31.2                          | 2.2                                            | 29.0              | 11.1                    | -24.5             | 35.6                          | 3.3                                            | 32.3              |

**Table S7b.** Energy decomposition analysis of FSTS and FSTS' transition structures of  $Y^-(H_2O)_n + CH_3I$   $S_N2$  reaction at B97-1/ECP/d level.

| n      | FSTS                |                  |         |                                    |         | FSTS'               |                  |         |                                    |         |
|--------|---------------------|------------------|---------|------------------------------------|---------|---------------------|------------------|---------|------------------------------------|---------|
|        | $\Delta E^\ddagger$ | $\Delta E_{int}$ | overall | $\Delta E_{prep}$<br>$Y^-(H_2O)_n$ | $CH_3I$ | $\Delta E^\ddagger$ | $\Delta E_{int}$ | overall | $\Delta E_{prep}$<br>$Y^-(H_2O)_n$ | $CH_3I$ |
| Y = F  |                     |                  |         |                                    |         |                     |                  |         |                                    |         |
| 0      | 14.4                | -17.3            | 31.7    | 0.0                                | 31.7    |                     |                  |         |                                    |         |
| 1      | 24.2                | -15.3            | 39.5    | 1.9                                | 37.6    | 24.8                | -18.9            | 43.7    | 2.4                                | 41.3    |
| 2      | 31.1                | -15.0            | 46.1    | 3.4                                | 42.7    | 30.8                | -17.8            | 48.6    | 2.6                                | 46.0    |
| Y = Cl |                     |                  |         |                                    |         |                     |                  |         |                                    |         |
| 0      | 31.4                | -16.1            | 47.5    | 0.0                                | 47.5    |                     |                  |         |                                    |         |
| 1      | 33.3                | -16.1            | 49.4    | 0.7                                | 48.7    | 33.9                | -17.5            | 51.4    | 2.3                                | 49.1    |
| 2      | 35.6                | -17.5            | 53.1    | 1.7                                | 51.4    | 36.6                | -17.7            | 54.3    | 4.1                                | 50.2    |
| Y = Br |                     |                  |         |                                    |         |                     |                  |         |                                    |         |
| 0      | 33.5                | -15.8            | 49.3    | 0.0                                | 49.3    |                     |                  |         |                                    |         |
| 1      | 34.6                | -15.6            | 50.2    | 0.5                                | 49.7    | 35.9                | -16.4            | 52.3    | 2.4                                | 49.9    |
| 2      | 35.8                | -18.2            | 54.0    | 1.7                                | 52.3    | 38.1                | -17.2            | 55.3    | 4.2                                | 51.1    |
| Y = I  |                     |                  |         |                                    |         |                     |                  |         |                                    |         |
| 0      | 35.4                | -15.2            | 50.6    | 0.0                                | 50.6    |                     |                  |         |                                    |         |
| 1      | 35.4                | -15.5            | 50.9    | 0.4                                | 50.5    | 38.2                | -14.6            | 53.4    | 2.6                                | 50.8    |
| 2      | 35.8                | -18.4            | 54.2    | 1.7                                | 52.5    | 40.0                | -16.4            | 56.4    | 4.4                                | 52.0    |

**Table S8.** Looseness (%L) and asymmetry index (%AS) of the inv-S<sub>N</sub>2 and invTS-S<sub>N</sub>2' transition structures.

| n | inv-S <sub>N</sub> 2 transition structure                               | %CI <sup>‡</sup> | %CY <sup>‡</sup> | %L <sup>‡</sup> | %AS <sup>‡</sup> |
|---|-------------------------------------------------------------------------|------------------|------------------|-----------------|------------------|
| 0 | F <sup>-</sup> ···HCH <sub>2</sub> ···I                                 | 5.03             | 81.12            | 86.15           | 76.09            |
| 1 | F <sup>-</sup> (H <sub>2</sub> O)···CH <sub>3</sub> ···I                | 16.05            | 50.21            | 66.17           | 34.16            |
| 2 | F <sup>-</sup> (H <sub>2</sub> O) <sub>2</sub> ···CH <sub>3</sub> ···I  | 21.41            | 41.13            | 62.54           | 19.72            |
| 0 | Cl <sup>-</sup> ···CH <sub>3</sub> ···I                                 | 21.03            | 36.26            | 57.29           | 15.23            |
| 1 | Cl <sup>-</sup> (H <sub>2</sub> O)···CH <sub>3</sub> ···I               | 24.43            | 31.73            | 56.16           | 7.30             |
| 2 | Cl <sup>-</sup> (H <sub>2</sub> O) <sub>2</sub> ···CH <sub>3</sub> ···I | 25.50            | 30.13            | 55.63           | 4.63             |
| 0 | Br <sup>-</sup> ···CH <sub>3</sub> ···I                                 | 23.64            | 30.37            | 54.01           | 6.73             |
| 1 | Br <sup>-</sup> (H <sub>2</sub> O)···CH <sub>3</sub> ···I               | 26.20            | 27.21            | 53.41           | 1.01             |
| 2 | Br <sup>-</sup> (H <sub>2</sub> O) <sub>2</sub> ···CH <sub>3</sub> ···I | 28.99            | 24.09            | 53.08           | -4.9             |
| 0 | I <sup>-</sup> ···CH <sub>3</sub> ···I                                  | 26.20            | 26.29            | 52.49           | 0.09             |
| 1 | I <sup>-</sup> (H <sub>2</sub> O)···CH <sub>3</sub> ···I                | 27.41            | 24.38            | 51.79           | -3.03            |
| 2 | I <sup>-</sup> (H <sub>2</sub> O) <sub>2</sub> ···CH <sub>3</sub> ···I  | 29.18            | 22.80            | 51.98           | -6.38            |
| n | inv-S <sub>N</sub> 2' transition structure                              | %CI <sup>‡</sup> | %CO <sup>‡</sup> | %L <sup>‡</sup> | %AS <sup>‡</sup> |
| 1 | HO <sup>-</sup> (HF)···CH <sub>3</sub> ···I                             | 17.36            | 53.75            | 71.11           | 36.39            |
| 2 | HO <sup>-</sup> (HF)(H <sub>2</sub> O)···CH <sub>3</sub> ···I           | 22.62            | 43.73            | 66.35           | 21.11            |
| 1 | HO <sup>-</sup> (HCl)···CH <sub>3</sub> ···I                            | 27.83            | 36.21            | 64.04           | 8.38             |
| 2 | HO <sup>-</sup> (HCl)(H <sub>2</sub> O)···CH <sub>3</sub> ···I          | 28.11            | 35.65            | 63.76           | 7.54             |
| 1 | HO <sup>-</sup> (HBr)···CH <sub>3</sub> ···I                            | 29.83            | 33.40            | 63.23           | 3.57             |
| 2 | HO <sup>-</sup> (HBr)(H <sub>2</sub> O)···CH <sub>3</sub> ···I          | 29.22            | 33.96            | 63.18           | 4.74             |
| 1 | HO <sup>-</sup> (HI)···CH <sub>3</sub> ···I                             | 32.15            | 30.11            | 62.26           | -2.04            |
| 2 | HO <sup>-</sup> (HI)(H <sub>2</sub> O)···CH <sub>3</sub> ···I           | 30.57            | 32.07            | 62.64           | 1.5              |

Note: The transition structure looseness, %L<sup>‡</sup>, has been used in studying X<sup>-</sup> + CH<sub>3</sub>Y S<sub>N</sub>2 reaction in the gas phase and was found to correlate well with the inv-S<sub>N</sub>2 barrier heights.<sup>3</sup> Here we employ a modified definition of transition structure looseness for inv-S<sub>N</sub>2 (%L<sup>‡</sup>, eqn. 1) transition state for Y<sup>-</sup>(H<sub>2</sub>O)<sub>n</sub> + CH<sub>3</sub>I reaction.

$$\%L^{\ddagger} = \%CI^{\ddagger} + \%CY^{\ddagger} \quad (1a)$$

$$\%CI^{\ddagger} = 100 \times (r_{C-I}^{\ddagger} - r_{C-I}^{\text{Reactant}}) / r_{C-I}^{\text{Reactant}} \quad (1b)$$

$$\%CY^{\ddagger} = 100 \times (r_{C-Y}^{\text{Product}} - r_{C-Y}^{\ddagger}) / r_{C-Y}^{\text{Product}} \quad (1c)$$

where  $r_{C-I}^{\ddagger}$  and  $r_{C-Y}^{\ddagger}$  are the C-I and C-Y bond lengths in inv-S<sub>N</sub>2 transition structure, and  $r_{C-I}^{\text{Reactant}}$  is the C-I bond length in reactant CH<sub>3</sub>I,  $r_{C-Y}^{\text{Product}}$  is the C-Y bond length in product CH<sub>3</sub>Y. Calculated values are present in **Table S8**.

As for inv-S<sub>N</sub>2' transition state, we also employed a similar definition of transition structure looseness (%L<sup>‡</sup>, eqn. 2).

$$\%L^{\ddagger'} = \%CI^{\ddagger'} + \%CO^{\ddagger'} \quad (2a)$$

$$\%CI^{\ddagger'} = 100 \times (r_{C-I}^{\ddagger'} - r_{C-I}^{\text{Reactant}}) / r_{C-I}^{\text{Reactant}} \quad (2b)$$

$$\%CO^{\ddagger'} = 100 \times (r_{C-O}^{\ddagger'} - r_{C-O}^{\text{Product}}) / r_{C-O}^{\text{Product}} \quad (2c)$$

Where  $r_{C-I}^{\ddagger'}$  and  $r_{C-O}^{\ddagger'}$  are the C-I and C-O bondlengths in inv-S<sub>N</sub>2' transition structure, and  $r_{C-O}^{\text{Product}}$  is the C-O bond length in product CH<sub>3</sub>OH.

The geometrical asymmetry of inv-S<sub>N</sub>2 (%AS<sup>‡</sup>) and inv-S<sub>N</sub>2' (%AS<sup>‡'</sup>) transition structures are defined by:

$$\%AS^{\ddagger} = \%CY^{\ddagger} - \%CI^{\ddagger} \quad (3)$$

$$\%AS^{\ddagger'} = \%CO^{\ddagger'} - \%CI^{\ddagger'} \quad (4)$$

**Table S9.** Bond metrics for halogen-bonded complex XC' and nXTS' of HO<sup>-</sup>-S<sub>N</sub>2 channel for Y<sup>-</sup>(H<sub>2</sub>O)<sub>n=1,2</sub> + CH<sub>3</sub>I reactions at B97-1/ECP/d level of theory. Bond distances are in Angstrom, angles are in degree, and imaginary frequency in cm<sup>-1</sup>.

| Nucleophile         | n = 1                             |                                    |                                    |                                   | n = 2                                          |                                                 |                                                 |                                                |       |
|---------------------|-----------------------------------|------------------------------------|------------------------------------|-----------------------------------|------------------------------------------------|-------------------------------------------------|-------------------------------------------------|------------------------------------------------|-------|
|                     | F <sup>-</sup> (H <sub>2</sub> O) | Cl <sup>-</sup> (H <sub>2</sub> O) | Br <sup>-</sup> (H <sub>2</sub> O) | I <sup>-</sup> (H <sub>2</sub> O) | F <sup>-</sup> (H <sub>2</sub> O) <sub>2</sub> | Cl <sup>-</sup> (H <sub>2</sub> O) <sub>2</sub> | Br <sup>-</sup> (H <sub>2</sub> O) <sub>2</sub> | I <sup>-</sup> (H <sub>2</sub> O) <sub>2</sub> |       |
| nXC'                | C-I                               | 2.198                              | 2.163                              | 2.160                             | 2.157                                          | 2.172                                           | 2.161                                           | 2.159                                          | 2.157 |
|                     | C-O                               | 4.797                              | 5.000                              | 5.032                             | 5.081                                          | 4.921                                           | 5.008                                           | 5.031                                          | 5.063 |
|                     | I-O                               | 2.600                              | 2.836                              | 2.873                             | 2.925                                          | 2.750                                           | 2.848                                           | 2.873                                          | 2.907 |
|                     | ∠C-I-O                            | 178.5                              | 177.4                              | 177.5                             | 177.7                                          | 178.0                                           | 178.1                                           | 178.2                                          | 178.3 |
| nXTS'               | C-I                               | 2.145                              | 2.145                              | 2.146                             | 2.146                                          | -                                               | 2.150                                           | 2.150                                          | 2.151 |
|                     | I-O                               | 3.371                              | 3.412                              | 3.415                             | 3.422                                          | -                                               | 3.223                                           | 3.243                                          | 3.317 |
|                     | ∠C-I-O                            | 134.1                              | 143.0                              | 144.9                             | 146.9                                          | -                                               | 156.1                                           | 156.7                                          | 155.1 |
|                     | ∠C-O-I                            | 17.6                               | 14.1                               | 13.4                              | 12.6                                           | -                                               | 9.5                                             | 9.3                                            | 9.8   |
|                     | ∠I-C-O                            | 28.3                               | 22.8                               | 21.7                              | 20.4                                           | -                                               | 14.4                                            | 14.1                                           | 15.2  |
|                     | imaginary frequency               | i80                                | i63                                | i54                               | i54                                            | -                                               | i49                                             | i51                                            | i116  |
| nXTS <sub>iso</sub> | C-I                               | 2.163                              | 2.155                              | 2.154                             | 2.153                                          | 2.156                                           | 2.152                                           | 2.151                                          | 2.151 |
|                     | I-O                               | 3.146                              | 3.366                              | 3.428                             | 3.516                                          | 3.272                                           | 3.463                                           | 3.521                                          | 3.581 |
|                     | I-Y                               | 3.260                              | 3.982                              | 4.187                             | 4.475                                          | 3.370                                           | 4.088                                           | 4.313                                          | 4.613 |
|                     | O-Y                               | 2.422                              | 3.060                              | 3.260                             | 3.532                                          | 2.495                                           | 3.054                                           | 3.234                                          | 3.486 |
|                     | ∠Y-I-O                            | 44.4                               | 48.3                               | 49.5                              | 50.7                                           | 44.1                                            | 46.8                                            | 47.4                                           | 48.4  |
|                     | imaginary frequency               | i113                               | i66                                | i56                               | i48                                            | i75                                             | i63                                             | i49                                            | i41   |

**Table S10.** The ratio  $r^{\text{vdw}}$  of the I-O distance of the halogen-bond complexes XC' and transition state XTS' to the sum of van der Waals radii of atom I and O.

| Y  | n=1  |      | n=2  |      |
|----|------|------|------|------|
|    | XC'  | XTS' | XC'  | XTS' |
| F  | 0.74 | 0.96 | 0.79 | -    |
| Cl | 0.81 | 0.97 | 0.81 | 0.92 |
| Br | 0.84 | 0.98 | 0.82 | 0.93 |
| I  | 0.84 | 0.98 | 0.83 | 0.95 |

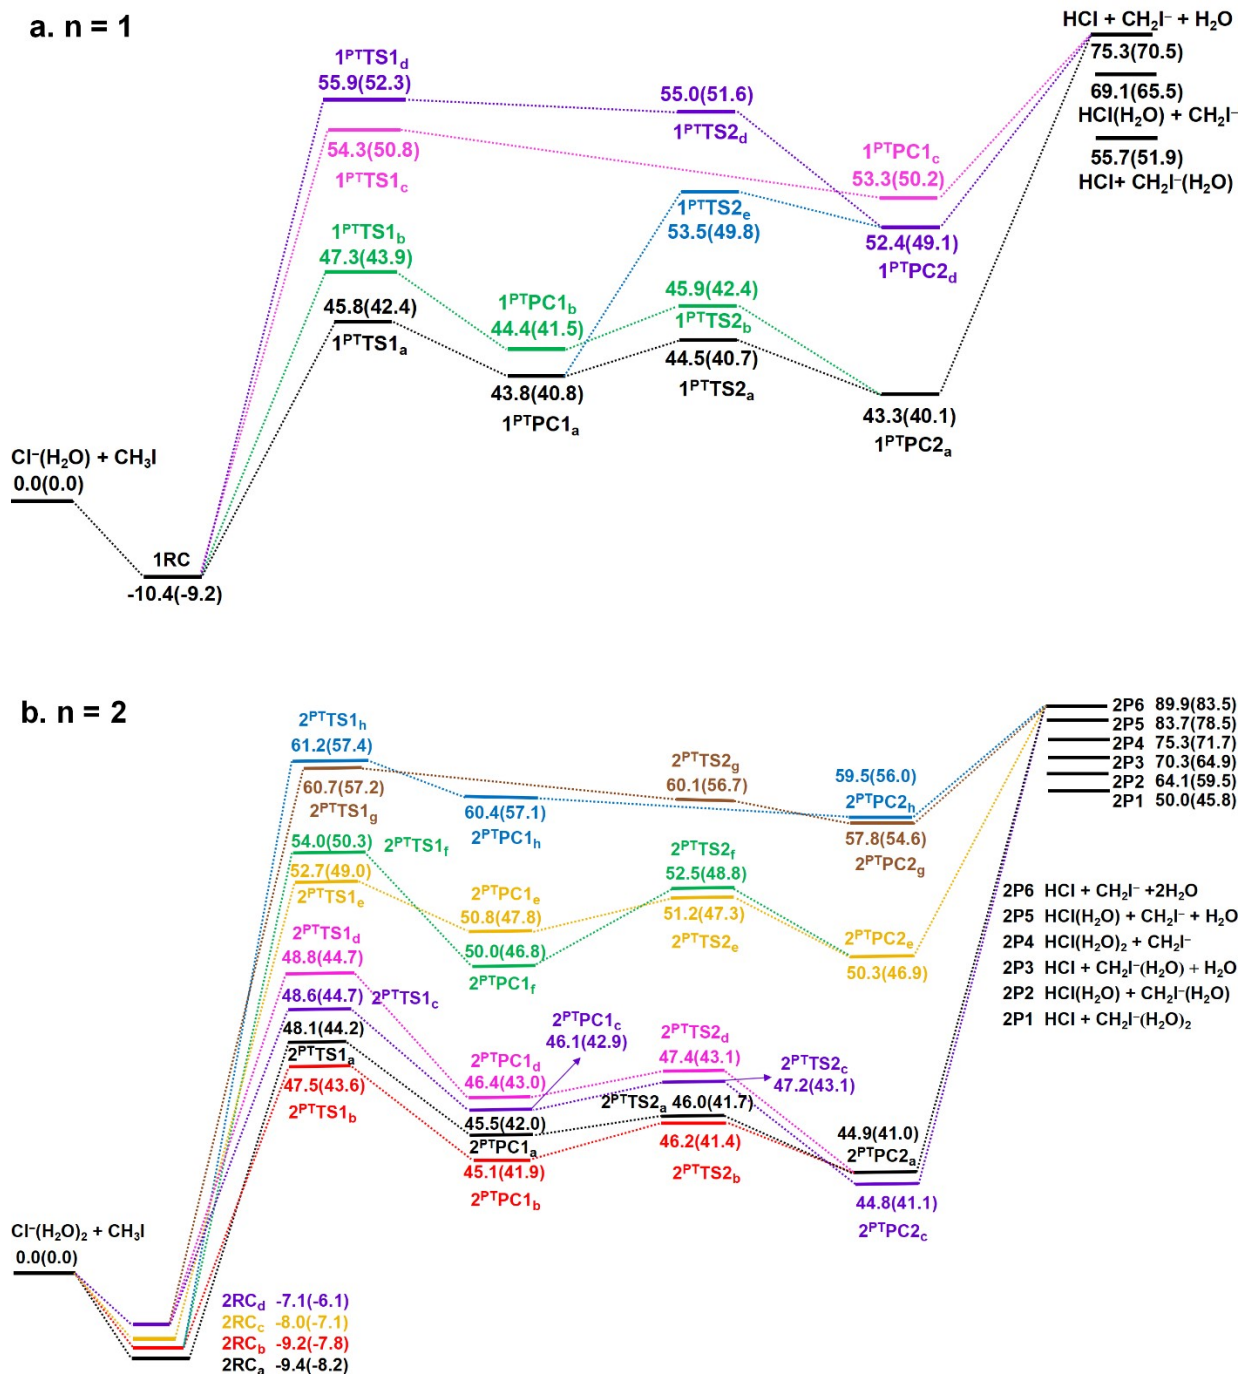

**Figure S1.** Potential energy profile of  $\text{Cl}^-(\text{H}_2\text{O})_{1,2} + \text{CH}_3\text{I}$   $\text{PT}_{\text{CH}_3}$  product channel at B97-1/ECP/d method. Calculated energy (in kcal/mol) values without zero-point energy (ZPE) are in normal text, and enthalpy values at 298.15 K are in parentheses.



a. n = 1

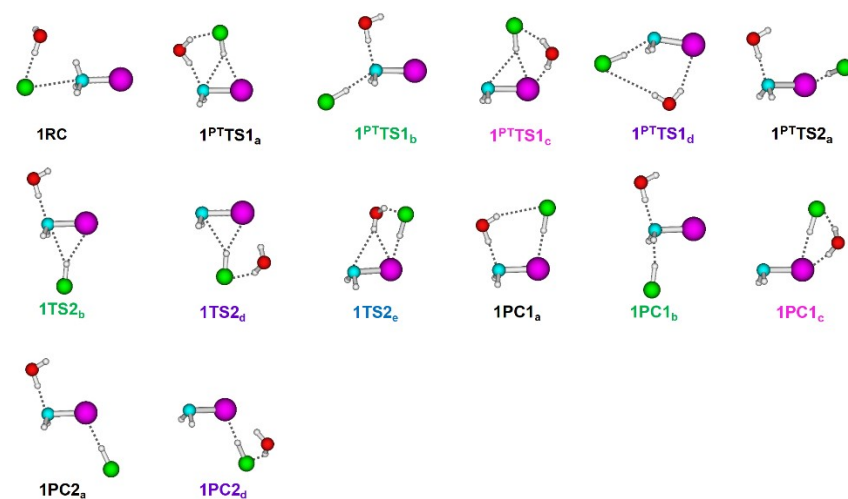

b. n = 2

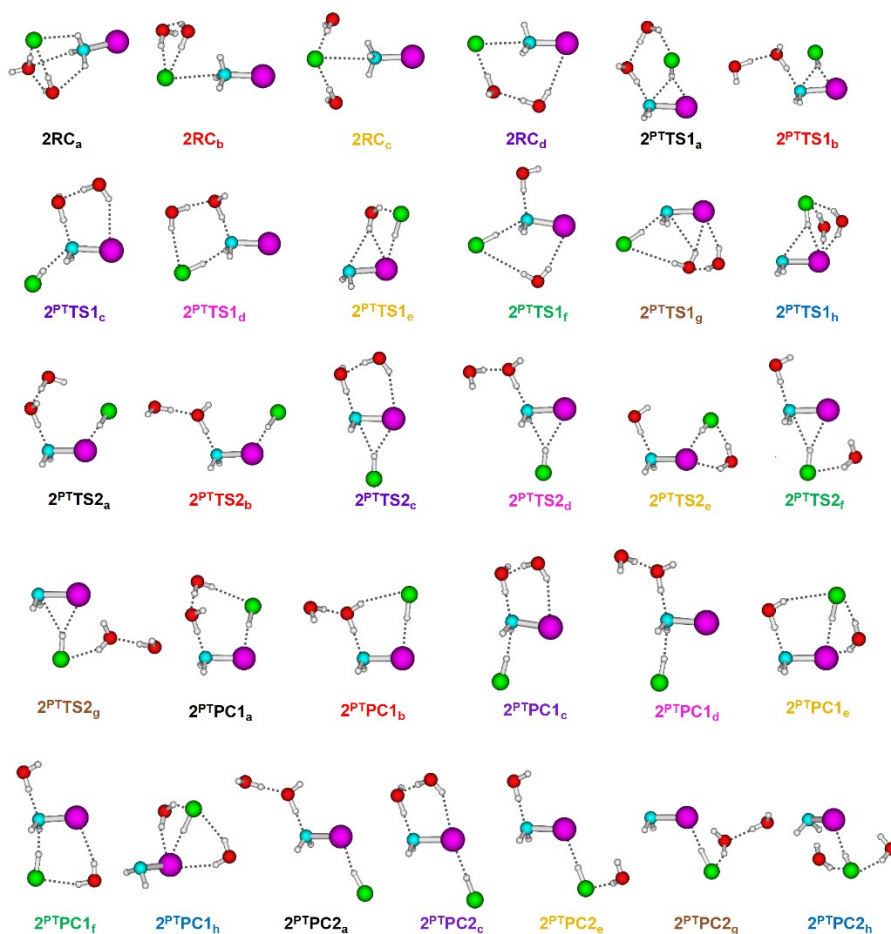

**Figure S2.** Structures of the stationary points for Cl<sup>-</sup>(H<sub>2</sub>O)<sub>1,2</sub> + CH<sub>3</sub>I PT<sub>CH3</sub> product channel optimized at B97-1/ECP/d level of theory. Color code: H, white; C, blue; O, red; Cl, green; I, pink.

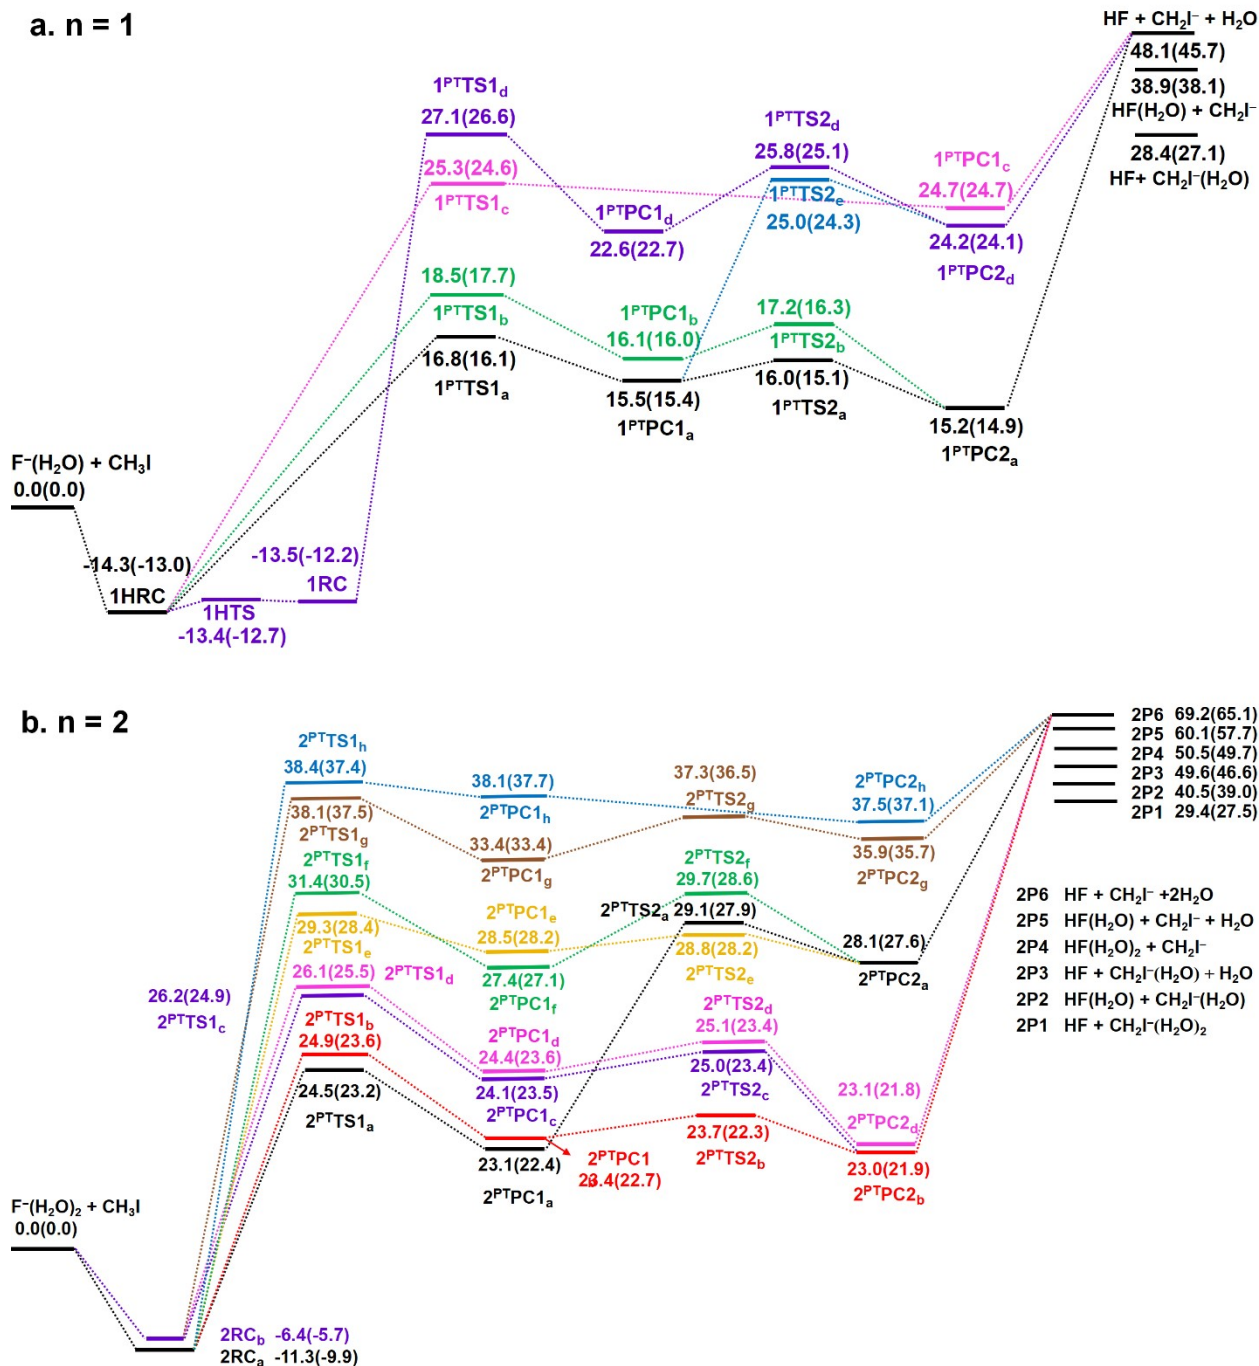

**Figure S3.** Potential energy profile of  $\text{F}^-(\text{H}_2\text{O})_{1,2} + \text{CH}_3\text{I}$   $\text{PT}_{\text{CH}_3}$  product channel at B97-1/ECP/d method. Calculated energy (in kcal/mol) values without zero-point energy (ZPE) are in normal text, and enthalpy values at 298.15 K are in parentheses.

a. n = 1

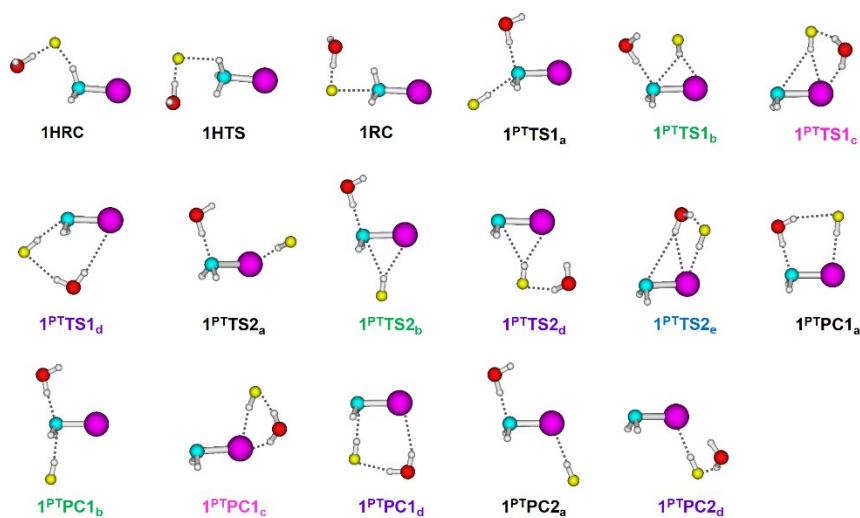

b. n = 2

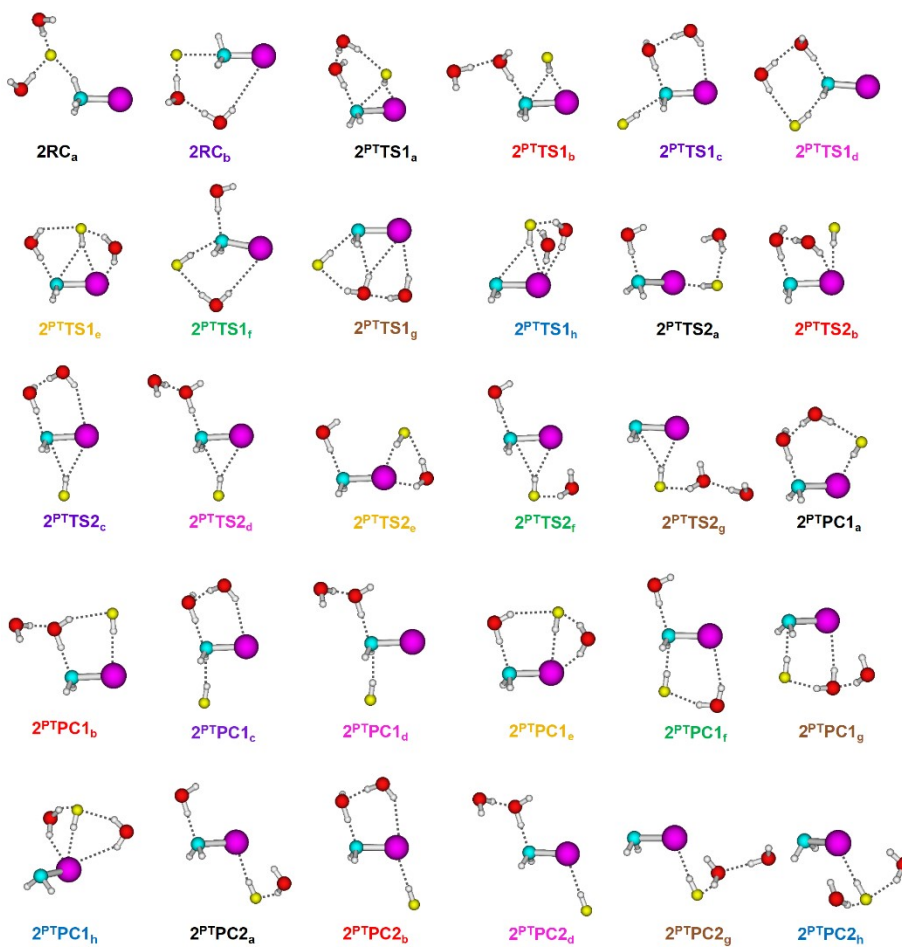

**Figure S4.** Structures of the stationary points for  $F^-(H_2O)_{1,2} + CH_3I \rightarrow PT_{CH_3}$  product channel optimized at B97-1/ECP/d level of theory. Color code: H, white; C, blue; O, red; F, yellow; I, pink.

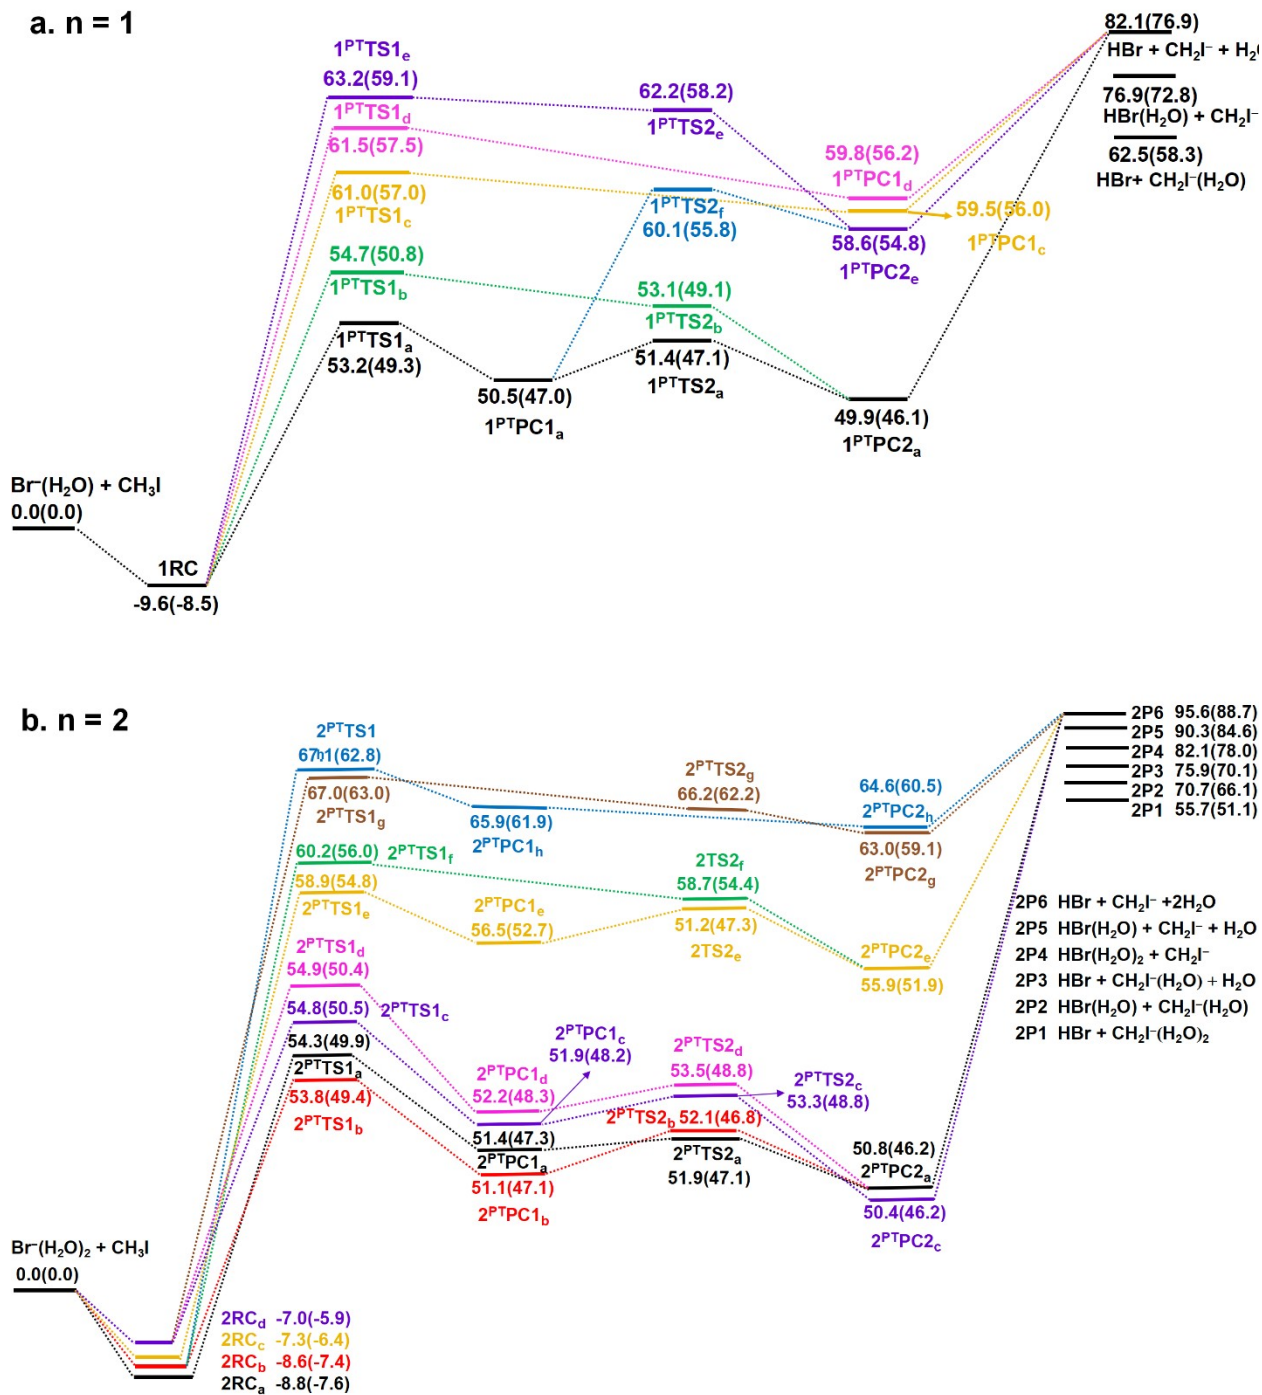

**Figure S5.** Potential energy profile of Br<sup>-</sup>(H<sub>2</sub>O)<sub>1,2</sub> + CH<sub>3</sub>I PT<sub>CH3</sub> product channel at B97-1/ECP/d method. Calculated energy (in kcal/mol) values without zero-point energy (ZPE) are in normal text, and enthalpy values at 298.15 K are in parentheses.

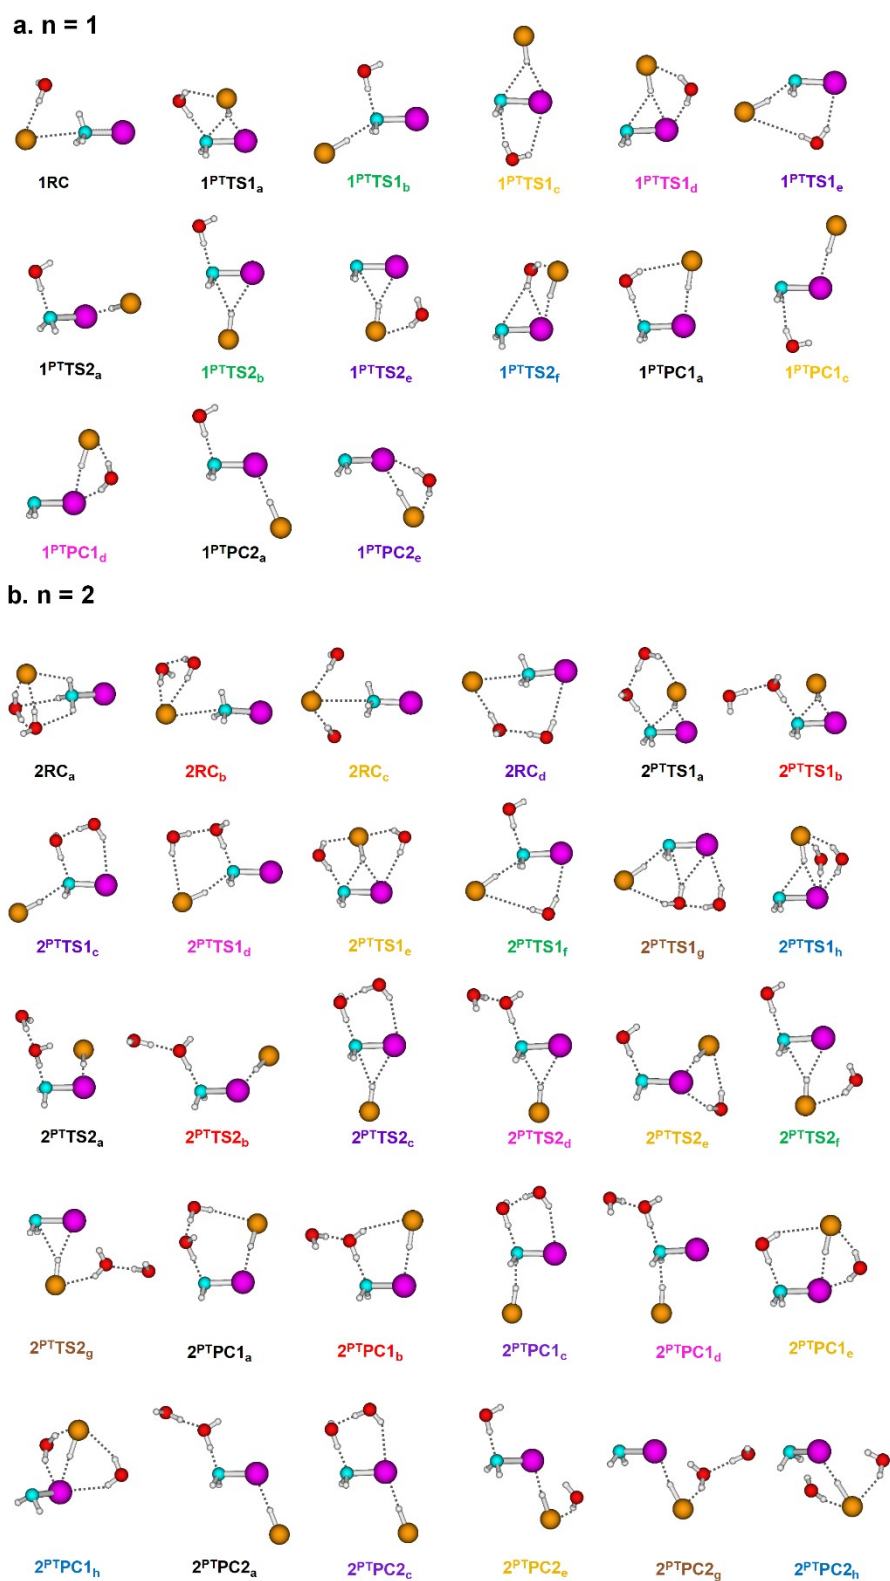

**Figure S6.** Structures of the stationary points for  $\text{Br}^-(\text{H}_2\text{O})_{1,2} + \text{CH}_3\text{I}$   $\text{PT}_{\text{CH}_3}$  product channel optimized at B97-1/ECP/d level of theory. Color code: H, white; C, blue; O, red; Br, orange; I, pink.

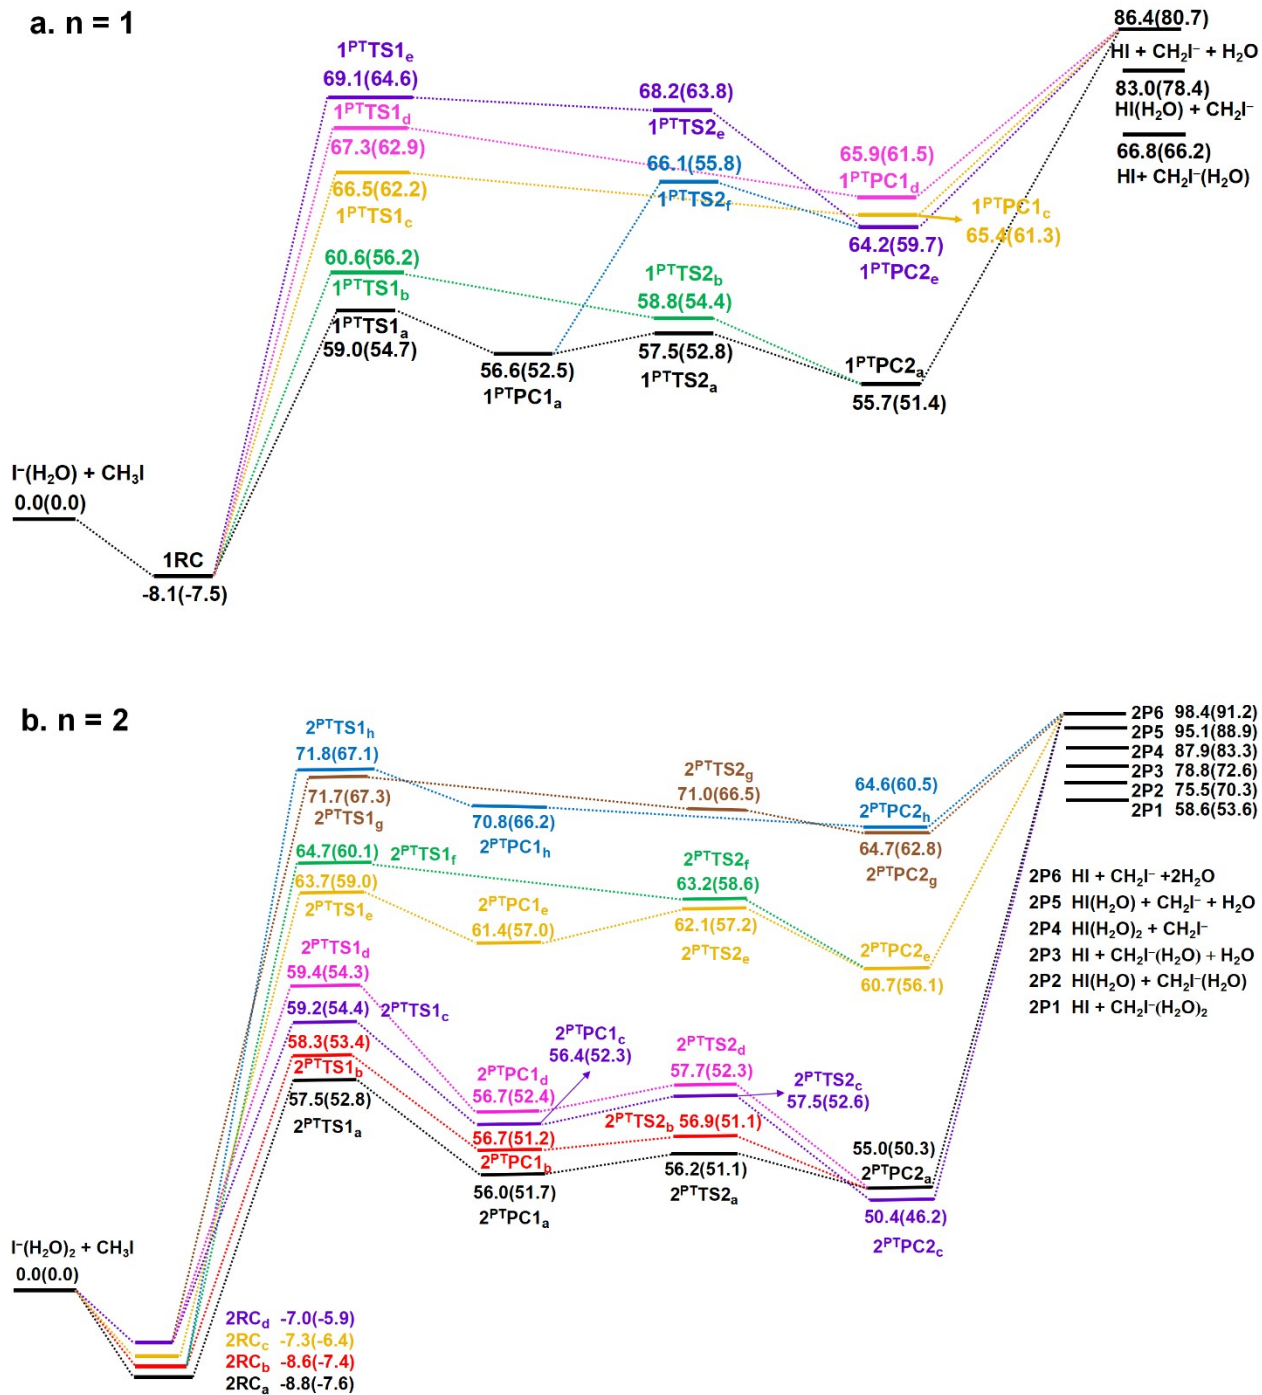

**Figure S7.** Potential energy profile of  $\text{I}^-(\text{H}_2\text{O})_{1,2} + \text{CH}_3\text{I}$   $\text{PT}_{\text{CH}_3}$  product channel at B97-1/ECP/d method. Calculated energy (in kcal/mol) values without zero-point energy (ZPE) are in normal text, and enthalpy values at 298.15 K are in parentheses.

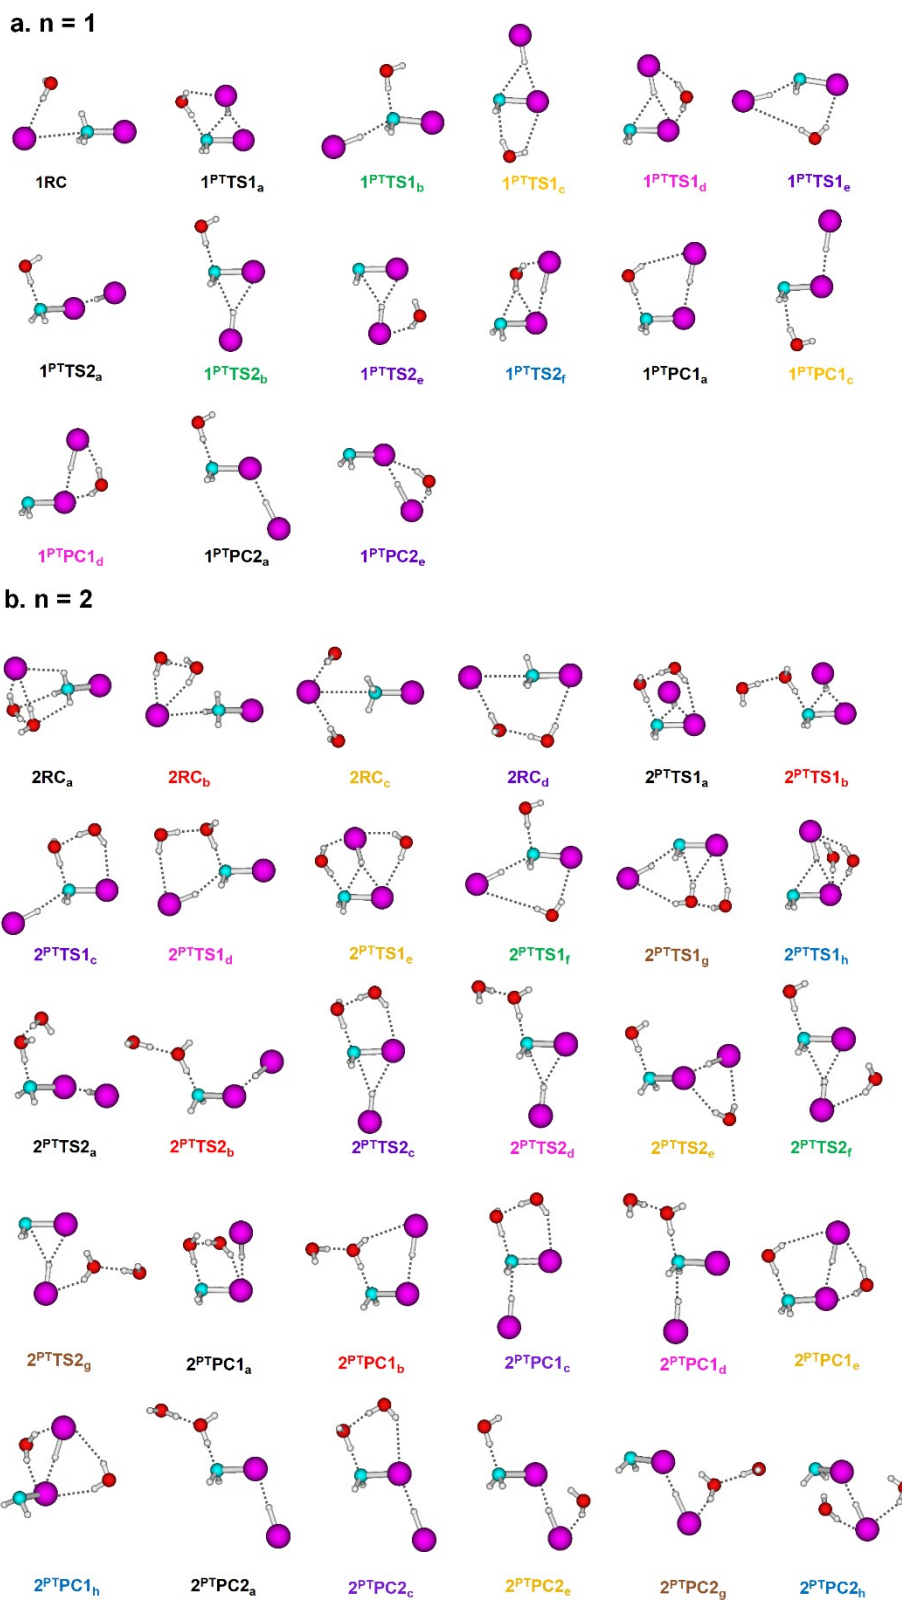

**Figure S8.** Structures of the stationary points for  $\text{I}^-(\text{H}_2\text{O})_{1,2} + \text{CH}_3\text{I}$   $\text{PT}_{\text{CH}_3}$  product channel optimized at B97-1/ECP/d level of theory. Color code: H, white; C, blue; O, red; I, pink.

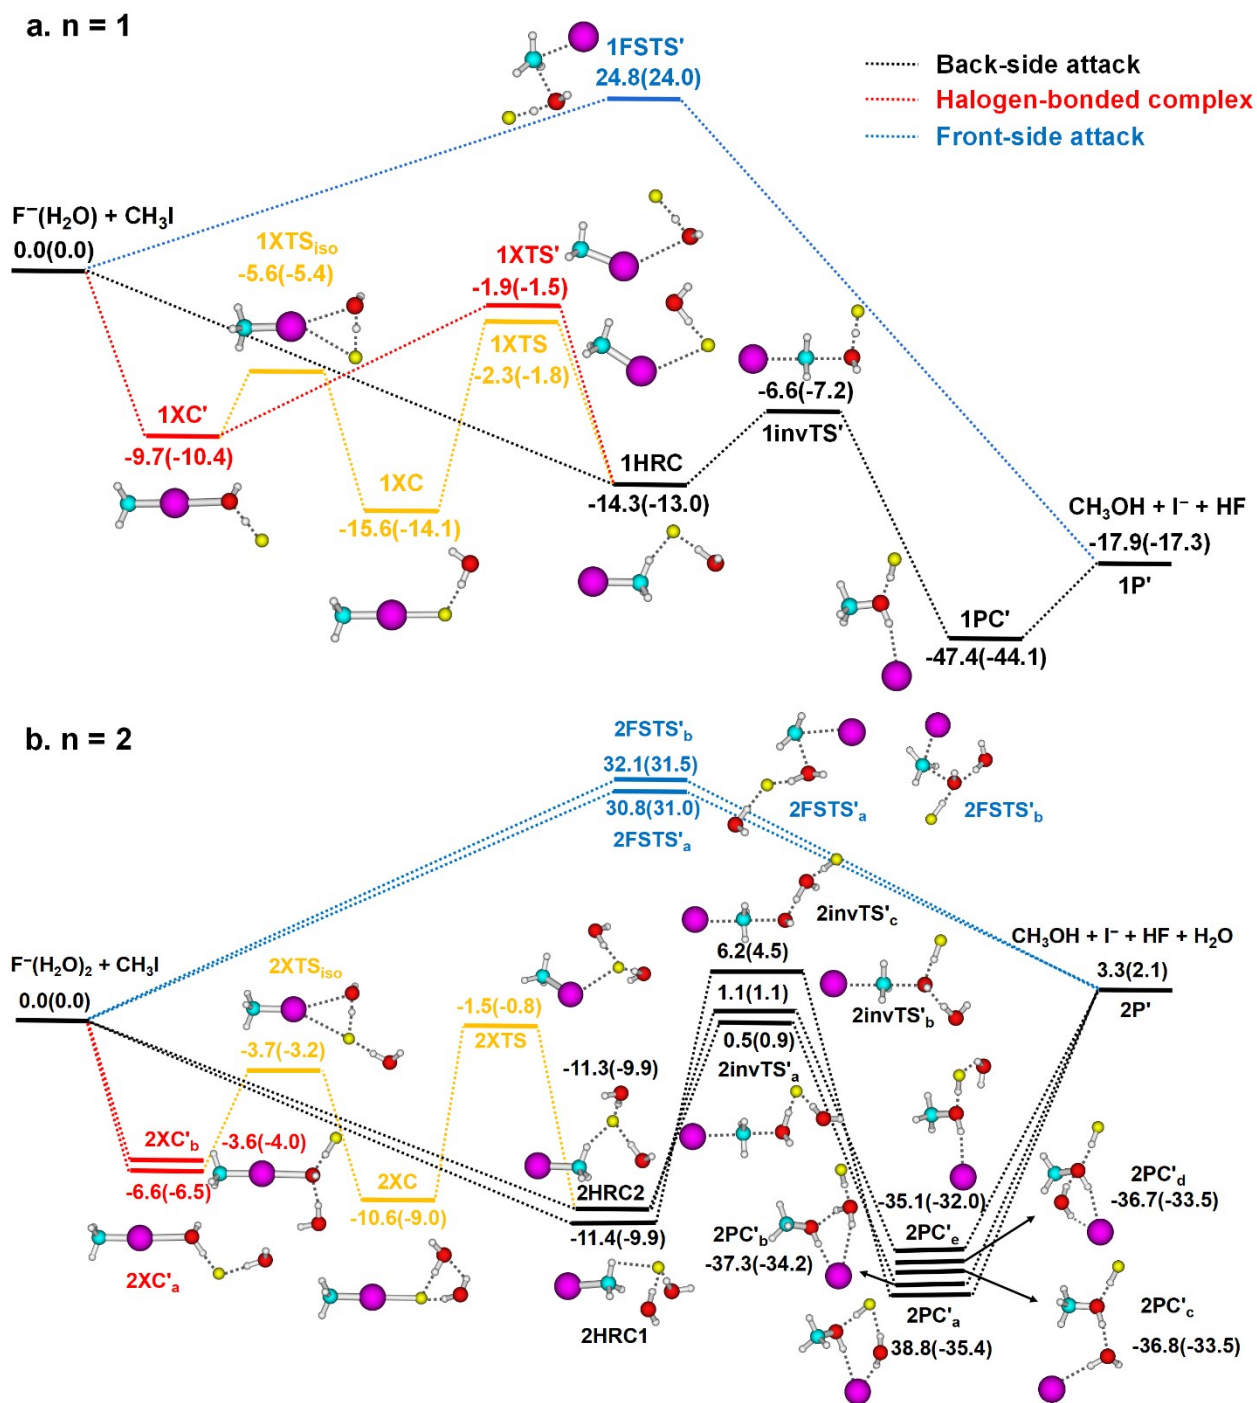

**Figure S9.** Potential energy profile of  $OH^-$ - $S_N2$  product channel for the  $F^-(H_2O)_{1,2} + CH_3I$  reaction at B97-1/ECP/d level of theory. Values without ZPE are in normal text and enthalpy values at 298.15 K are in parentheses. Color code: H, white; C, blue; O, red; F, yellow; I, pink.



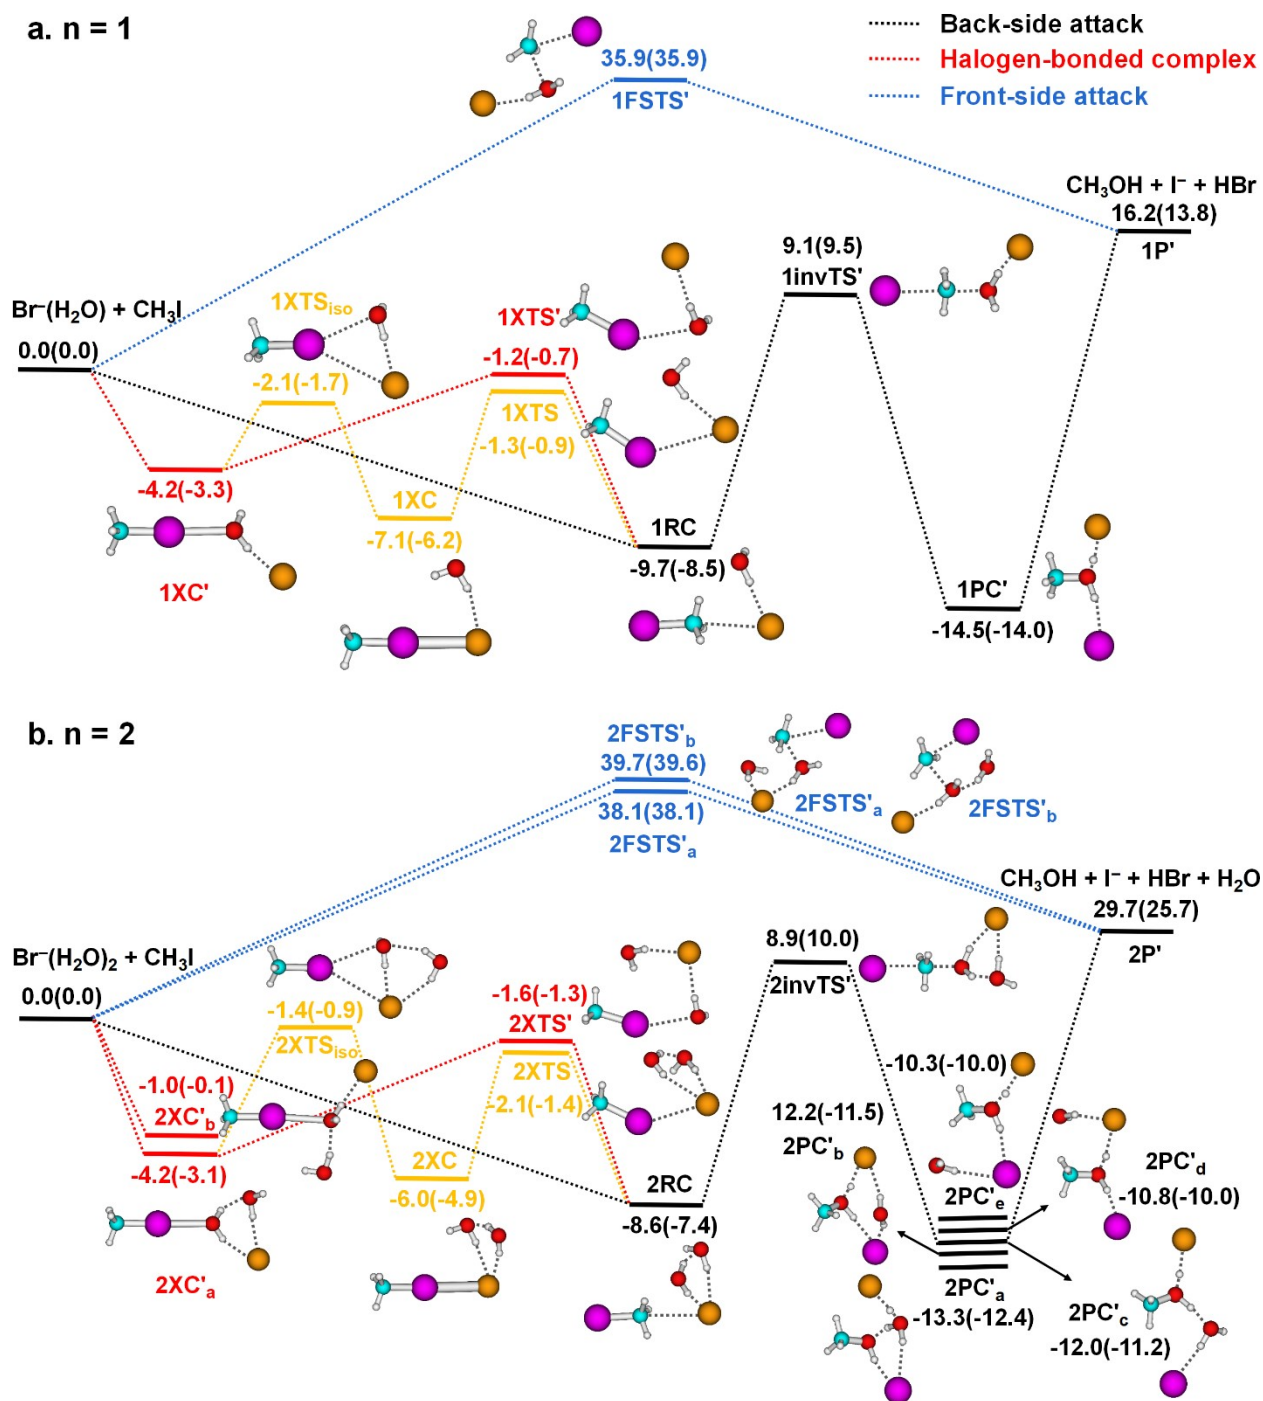

**Figure S10.** Potential energy profile of OH<sup>-</sup>-S<sub>N</sub>2 product channel for the Br<sup>-</sup>(H<sub>2</sub>O)<sub>1,2</sub> + CH<sub>3</sub>I reaction at B97-1/ECP/d level of theory. Values without ZPE are in normal text and enthalpy values at 298.15 K are in parentheses. Color code: H, white; C, blue; O, red; Br, orange; I, pink.

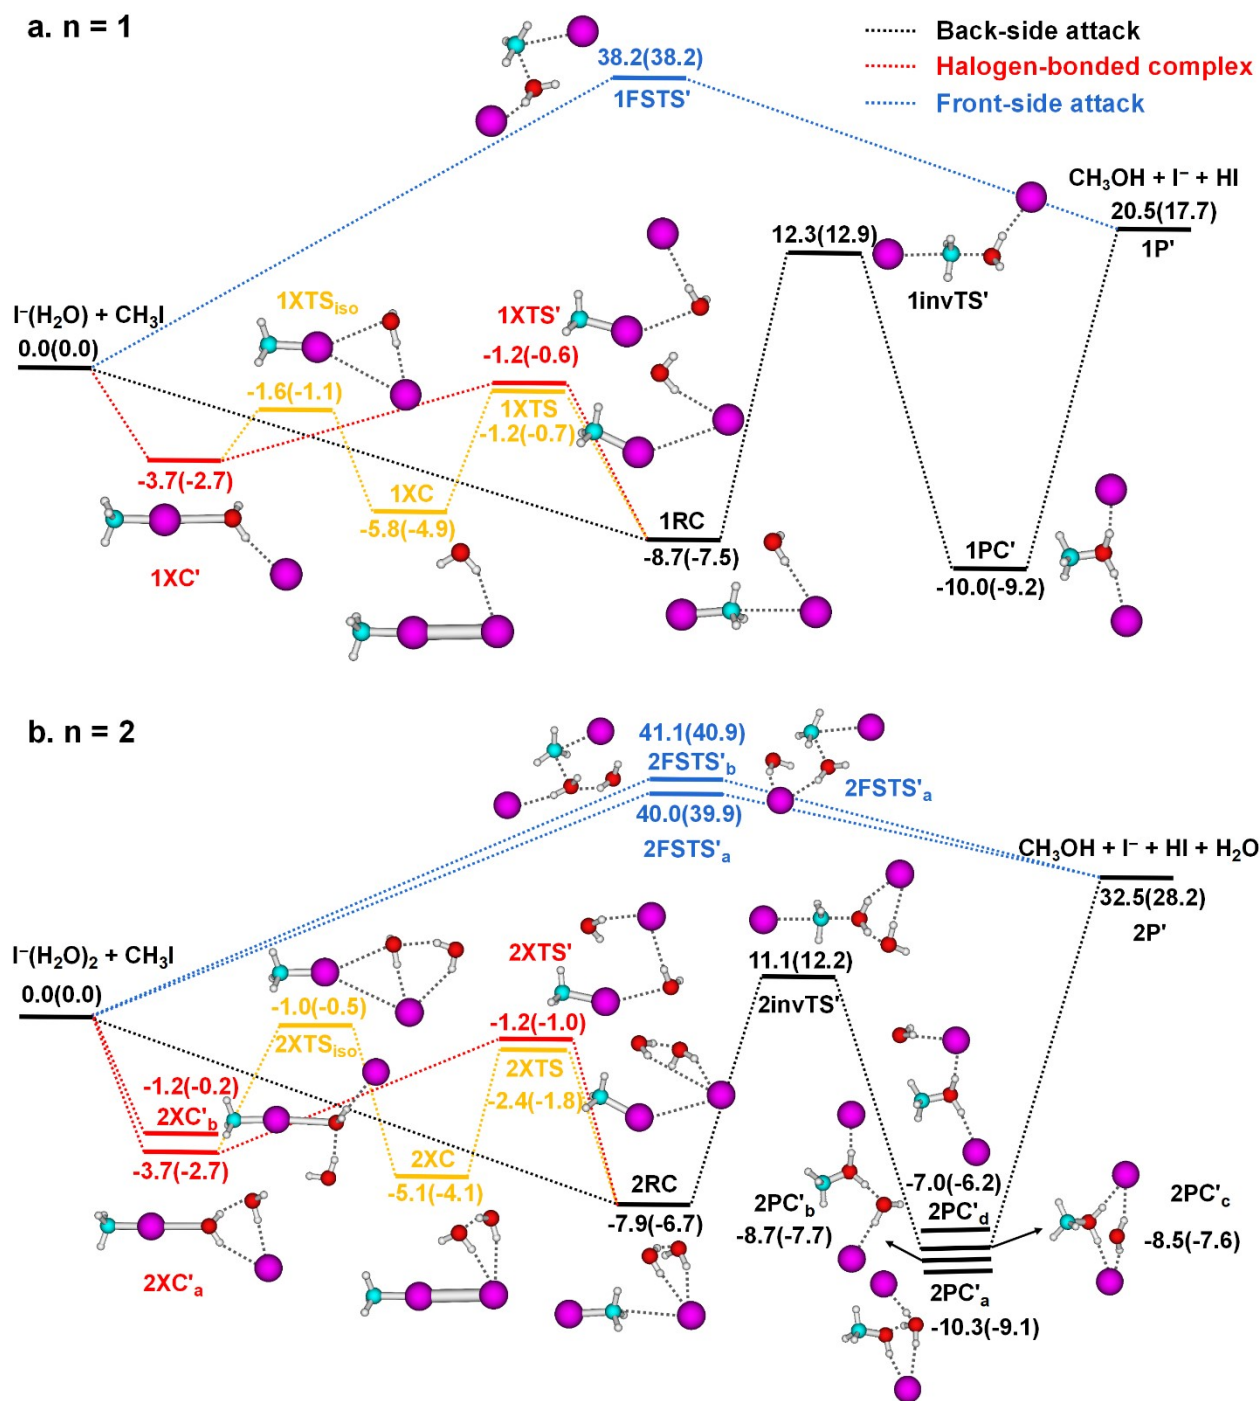

**Figure S11.** Potential energy profile of OH<sup>-</sup>-S<sub>N</sub>2 product channel for the I<sup>-</sup>(H<sub>2</sub>O)<sub>1,2</sub> + CH<sub>3</sub>I reaction at B97-1/ECP/d level of theory. Values without ZPE are in normal text and enthalpy values at 298.15 K are in parentheses. Color code: H, white; C, blue; O, red; I, pink.

**Figure S12.** Plots of inv-S<sub>N</sub>2 barrier heights vs a) %L<sup>‡</sup> and b) %AS<sup>‡</sup>, and inv-S<sub>N</sub>2' barrier heights vs c) %L<sup>‡</sup> and d) %AS<sup>‡</sup> (color code: green, Y = F, orange, Y = Cl, purple, Y = Br, blue, Y = I; symbol code: hollow, n = 0, half down, n = 1, solid, n = 2)

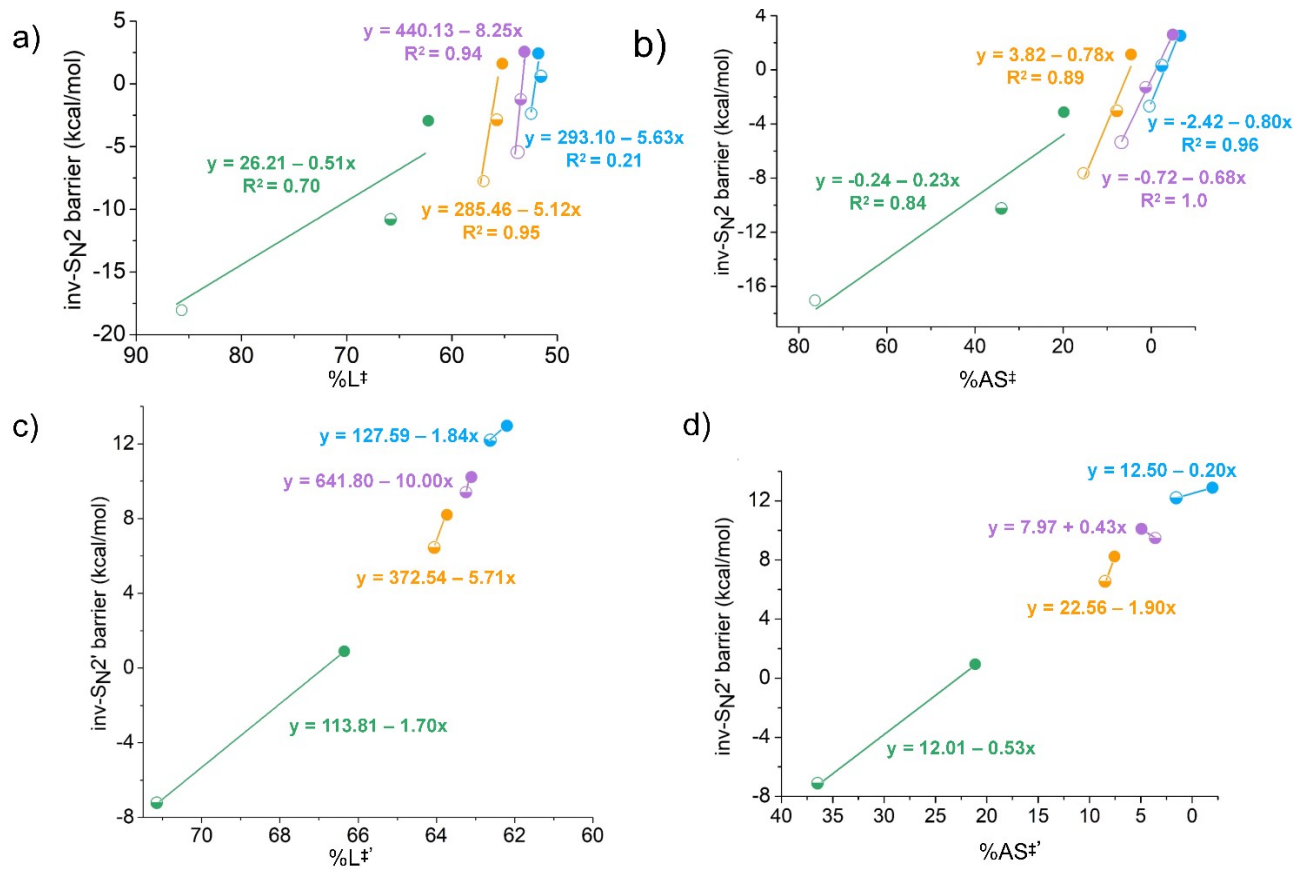

**Figure S13.** Donor and acceptor natural bond orbitals (NBOs) of the  $[\text{H}_3\text{C}\cdots\text{I}\cdots\text{OH}_2(\text{Y})]^-$  halogen-bonded complex to illustrate the charge transfer interaction between I and O.

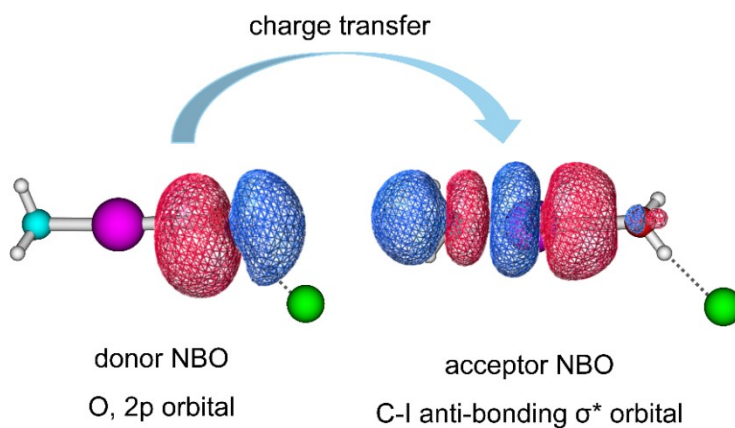

**Table S11.** The charge transfer stabilization energy between lone pair of nucleophile  $\text{H}_2\text{O}$  and C-I antibonding  $\sigma^*$  orbital of the halogen-bond complexes  $[\text{H}_3\text{C}\cdots\text{I}\cdots\text{OH}_2(\text{Y})]^-$  as calculated under NBO scheme.

| Y  | $E_{\text{stabilization}}$ (kcal/mol) |       |
|----|---------------------------------------|-------|
|    | n = 1                                 | n = 2 |
| F  | 14.98                                 | 10.43 |
| Cl | 7.69                                  | 7.33  |
| Br | 6.73                                  | 6.69  |
| I  | 5.71                                  | 5.96  |

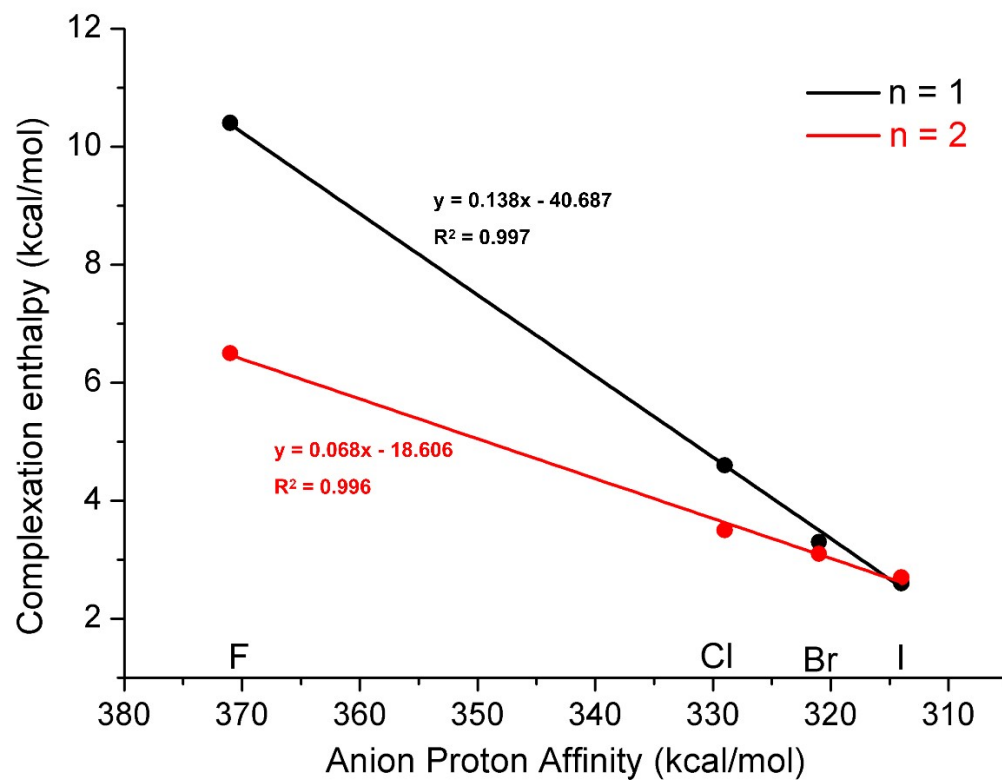

**Figure S14.** Complexation enthalpies of halogen-bonded complexes  $\text{XC}'$  as a function of halogen anion proton affinity of the halogen-bonded complexes  $[\text{CH}_3\text{---I---OH}_2(\text{Y})]^{-}(\text{H}_2\text{O})_{0,1}$ .

### a. back-side attack transition state (invTS')

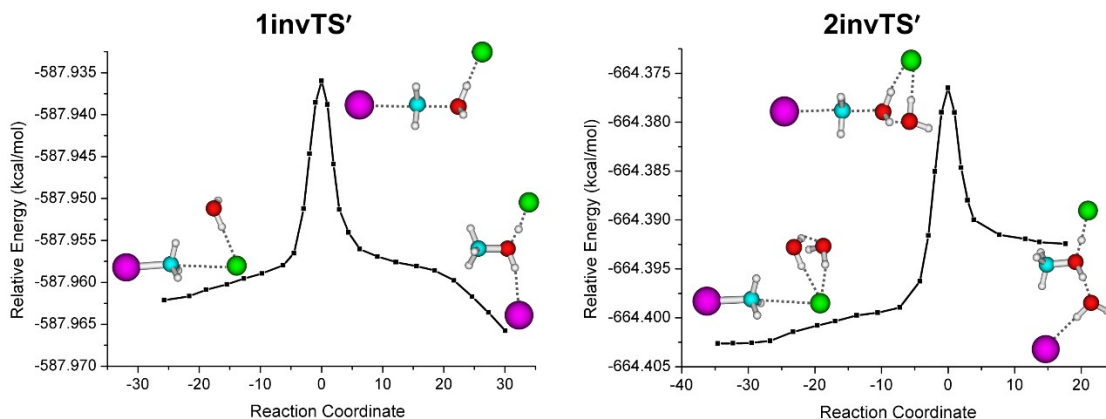

### b. Halogen-bonded complex transition state (XTS')

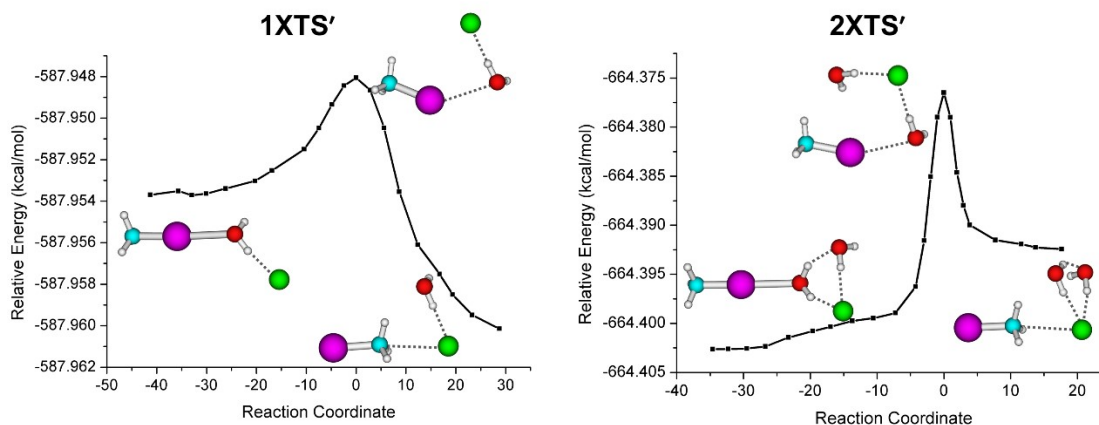

### c. Halogen-bonded complexes inversion transition state (XTS<sub>iso</sub>)

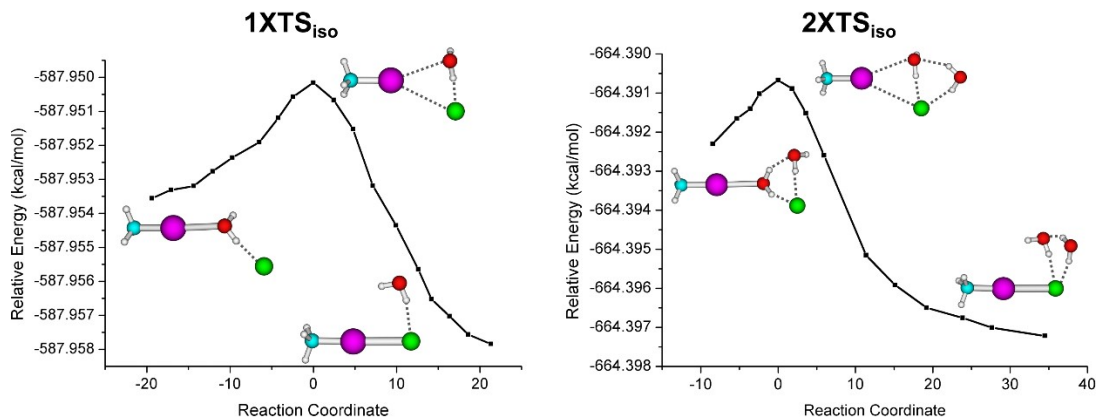

**Figure S15.** Intrinsic reaction coordinates (IRC) calculation of the invTS', XTS', and XTS<sub>iso</sub> Cl<sup>-</sup>(H<sub>2</sub>O)<sub>n=1,2</sub> + CH<sub>3</sub>I S<sub>N</sub>2 reaction using B97-1/ECP/d method.

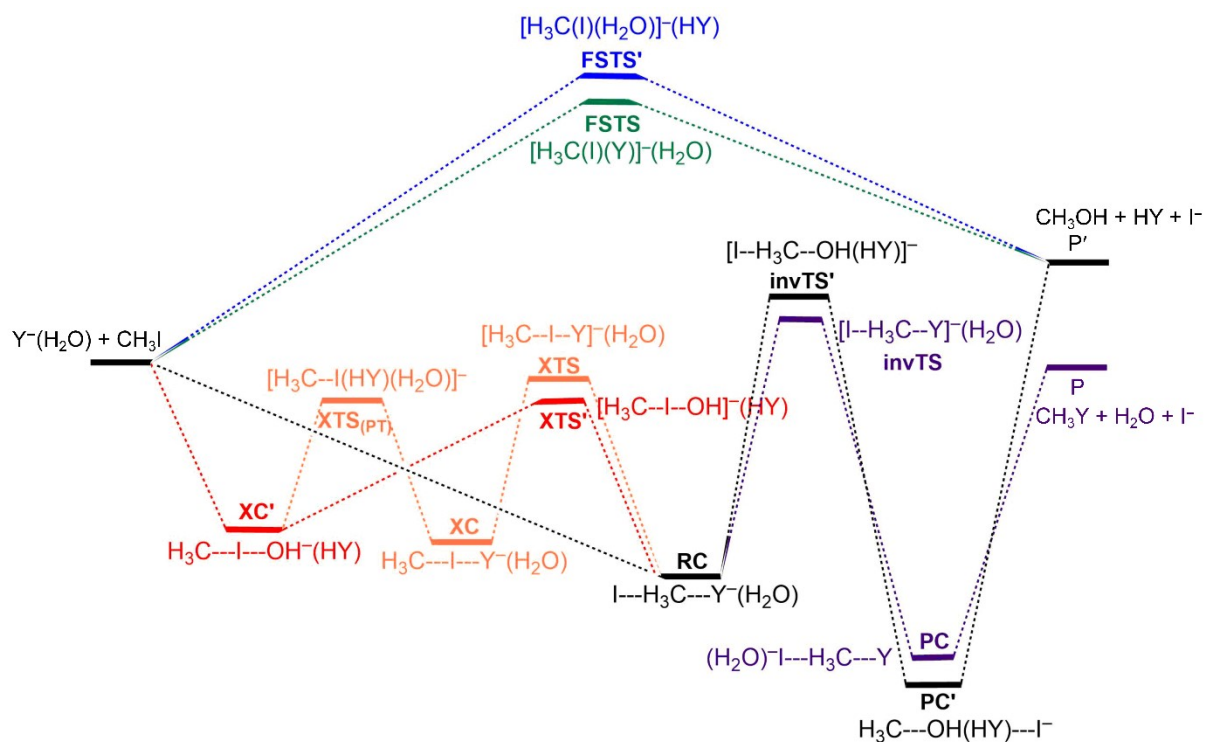

**Scheme S1.** Potential energy profile of  $Y^-$ - $S_N2$  and  $HO^-$ - $S_N2$  product channels for the  $Y^-(H_2O) + CH_3I$  reaction proceeding with back-side attack (black), front-side attack at carbon (blue), and halogen-bonded complex (red) mechanisms.
